# Supplementary material for: CIBERSORT analysis of TCGA and METABRIC identifies subgroups with better outcomes in triple negative breast cancer
Source: PubMed Central journal article supplement (PMC7907367; doi:10.1038/s41598-021-83913-7), 2021-02-25
Supplement: 41598_2021_83913_MOESM1_ESM.pdf [file 41598_2021_83913_MOESM1_ESM.pdf]

# CIBERSORT Analysis of TCGA and METABRIC Identifies Subgroups with Better Outcomes in Triple Negative Breast Cancer

Kelly E. Craven<sup>1</sup>, Yesim Gökmen-Polar<sup>2</sup>, and Sunil S. Badve<sup>2,3,4,\*</sup>

<sup>1</sup>Department of Pathology, Johns Hopkins University School of Medicine, Baltimore, MD 21287

<sup>2</sup>Department of Pathology and Laboratory Medicine, Indiana University School of Medicine, Indianapolis, IN 46202

<sup>3</sup>Department of Medicine, Indiana University School of Medicine, Indianapolis, IN 46202

<sup>4</sup>Indiana University Melvin and Bren Simon Cancer Center, Indianapolis, IN 46202

\*Corresponding author: sbadve@iupui.edu

## Supplemental material

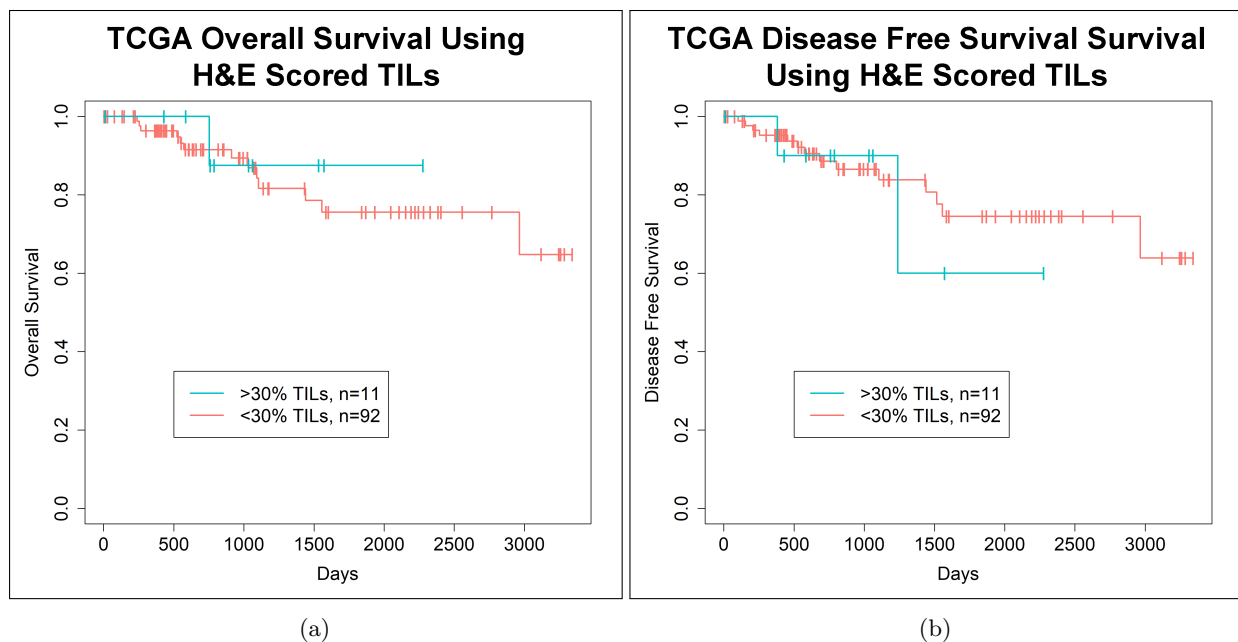

Figure S1: **Survival data from TCGA does not replicate clinical trial observations.** Kaplan-Meier curves showing no improvement in (a) OS ( $p = 0.69$ , log rank test) or (b) DFS ( $p = 0.69$ , log rank test) in TCGA TNBC patients with >30% TILs as compared to <30% TILs as scored by a pathologist. (a) and (b) Images generated with R 4.0.2 (<https://www.R-project.org>) [35].

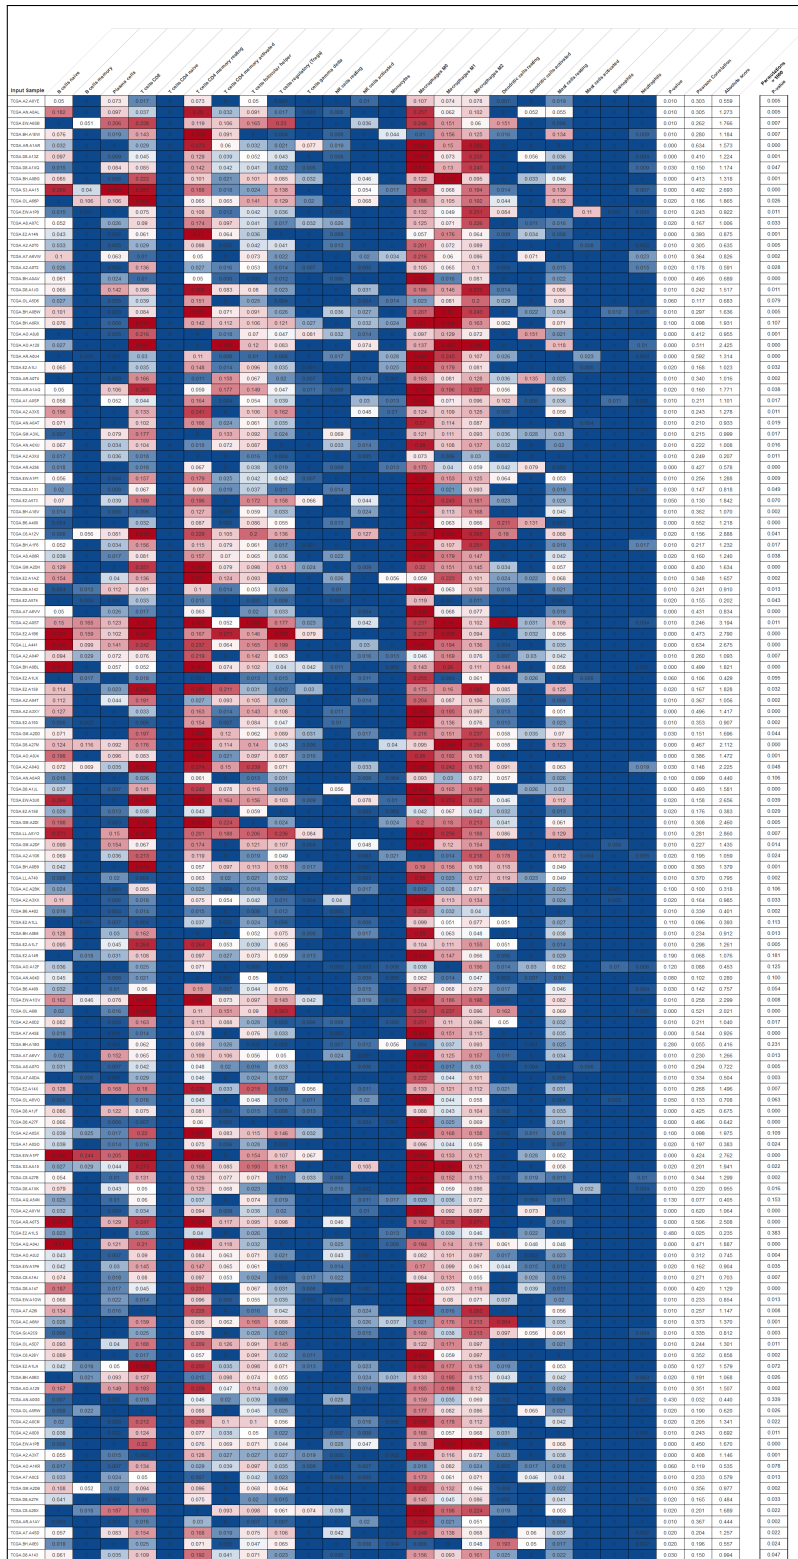

Figure S2: Quantification of immune cell infiltrate by CIBERSORT analysis of RNA-Seq gene expression data from TCGA TNBC cases. The heatmap returned by CIBERSORT shows the quantities of 22 different immune cell types among the 132 TCGA TNBC samples. CIBERSORT assigns a score of arbitrary units that reflects the absolute proportion of each cell type in a mixture. A higher score would indicate a higher proportion of that cell type. The far right column indicates the pvalue when 1000 permutations are used instead of 100. Image generated with CIBERSORT (<https://cibersort.stanford.edu>) [29].

**Table S1:** Prognostic Value of Immune Cell Types in TCGA TNBC Patients (Kaplan-Meier log rank test)

| Cell Type                    | Cut Off   | Low Cut Off            | High Cut Off           | Low Number | High Number | OS pvalue    | OS FDR | DFS pvalue   | DFS FDR |
|------------------------------|-----------|------------------------|------------------------|------------|-------------|--------------|--------|--------------|---------|
| CD8 T Cells                  | 0.25*sd   | 0.1011                 | 0.1726                 | 71         | 40          | <b>0.013</b> | 0.24   | 0.077        | 0.73    |
| CD8 T Cells                  | median    | 0.0849                 | 0.0849                 | 66         | 66          | <b>0.028</b> | 0.14   | 0.088        | 0.28    |
| CD8 T Cells                  | mean      | 0.1369                 | 0.1369                 | 82         | 50          | <b>0.028</b> | 0.28   | 0.176        | 0.75    |
| CD8 T Cells                  | 0.5*sd    | 0.0654                 | 0.2084                 | 55         | 31          | <b>0.032</b> | 0.36   | 0.158        | 0.68    |
| CD8 T Cells                  | quartiles | 0.0000, 0.0290, 0.0849 | 0.0849, 0.1916, 0.6908 | 33, 33     | 33, 33      | 0.094        | 0.48   | 0.280        | 0.54    |
| CD4 Memory Activated T Cells | 0.25*sd   | 0.0348                 | 0.0646                 | 72         | 45          | 0.105        | 0.45   | <b>0.034</b> | 0.66    |
| CD4 Memory Activated T Cells | median    | 0.0258                 | 0.0258                 | 66         | 66          | <b>0.038</b> | 0.14   | <b>0.011</b> | 0.11    |
| CD4 Memory Activated T Cells | mean      | 0.0497                 | 0.0497                 | 78         | 54          | 0.270        | 0.71   | 0.179        | 0.75    |
| CD4 Memory Activated T Cells | 0.5*sd    | 0.0199                 | 0.0794                 | 61         | 33          | 0.091        | 0.37   | <b>0.045</b> | 0.29    |
| CD4 Memory Activated T Cells | quartiles | 0.0000, 0.0007, 0.0258 | 0.0258, 0.0789, 0.3078 | 33, 33     | 33, 33      | 0.220        | 0.48   | 0.085        | 0.42    |
| M1 Macrophages               | 0.25*sd   | 0.1038                 | 0.1556                 | 60         | 41          | 0.210        | 0.50   | 0.194        | 0.74    |
| M1 Macrophages               | median    | 0.1109                 | 0.1109                 | 66         | 66          | 0.100        | 0.26   | 0.165        | 0.37    |
| M1 Macrophages               | mean      | 0.1297                 | 0.1297                 | 76         | 56          | 0.053        | 0.28   | 0.166        | 0.75    |
| M1 Macrophages               | 0.5*sd    | 0.0779                 | 0.1815                 | 50         | 27          | 0.056        | 0.36   | <b>0.032</b> | 0.29    |
| M1 Macrophages               | quartiles | 0.0000, 0.0599, 0.1109 | 0.1109, 0.1760, 0.5524 | 33, 33     | 33, 33      | 0.146        | 0.48   | 0.114        | 0.42    |

TCGA: The Cancer Genome Atlas; TNBC: triple negative breast cancer; OS: overall survival; DFS: disease free survival; sd: standard deviation; FDR: false discovery rate; **Bold:** pvalue < 0.05

**Table S2:** Survival Rates of TCGA TNBC Patients (Kaplan-Meier)

| Years | OS High CD8 T Cells (0.25*sd) | OS Low CD8 T Cells (0.25*sd) | DFS High CD4 Memory Activated T Cells (0.25*sd) | DFS Low CD4 Memory Activated T Cells (0.25*sd) | OS High CD8/High CD4 T Cells (cluster analysis) | OS Low CD8/Low CD4 T Cells (cluster analysis) |
|-------|-------------------------------|------------------------------|-------------------------------------------------|------------------------------------------------|-------------------------------------------------|-----------------------------------------------|
| 5     | 96.4%                         | 71.9%                        | 85.9%                                           | 58.2%                                          | 95.5%                                           | 73.1%                                         |
| 7     | 96.4%                         | 71.9%                        | 85.9%                                           | 58.2%                                          | 95.5%                                           | 73.1%                                         |
| 10    | 96.4%                         | 53.9%                        | 57.3%                                           | 58.2%                                          | 95.5%                                           | 54.8%                                         |

TCGA: The Cancer Genome Atlas; TNBC: triple negative breast cancer; OS: overall survival; DFS: disease free survival; sd: standard deviation

**Table S3:** Subtype Classification of TCGA TNBC Samples with Mutation Frequency Differences:  
High vs. Low CD8/CD4 T Cells (cluster analysis)

| Samples                                                   | Gene Mutation | High or Low Group | TNBC Subtypes     |
|-----------------------------------------------------------|---------------|-------------------|-------------------|
| TCGA.EW.A3U0, TCGA.D8.A27M,<br>TCGA.C8.A26X, TCGA.A2.A0CM | PIKFYVE       | high              | UNS, UNS, LAR, IM |
| TCGA.S3.AA10, TCGA.EW.A1PB,<br>TCGA.GM.A3XL, TCGA.GM.A2DD | LAMB2         | high              | IM, IM, IM, LAR   |
| TCGA.EW.A3U0, TCGA.GM.A3XL,<br>TCGA.OL.A5D7               | PKD1          | high              | UNS, IM, IM       |
| TCGA.AO.A128, TCGA.AR.A0TS,<br>TCGA.AQ.A04J               | CREBBP        | high              | IM, BL1, MSL      |
| TCGA.EW.A1PB, TCGA.E2.A1L7,<br>TCGA.BH.A0RX               | RGPD4         | high              | IM, NA, NA        |
| TCGA.D8.A27M, TCGA.OL.A66P,<br>TCGA.E2.A1B6               | IGHV2-70      | high              | UNS, LAR, IM      |
| TCGA.D8.A27M, TCGA.C8.A26X,<br>TCGA.GM.A2DD               | GGA1          | high              | UNS, LAR, LAR     |
| TCGA.D8.A27M, TCGA.E2.A1L7,<br>TCGA.A2.A0SX               | ATP9A         | high              | UNS, NA, BL2      |
| TCGA.AO.A128, TCGA.GM.A2DH,<br>TCGA.AR.A1AQ               | ATG2B         | high              | IM, UNS, IM       |
| TCGA.AO.A128, TCGA.A2.A04T,<br>TCGA.AR.A1AQ               | ZNF697        | high              | IM, BL1, IM       |
| TCGA.E2.A159, TCGA.EW.A1OV,<br>TCGA.A2.A04T               | SYBU          | high              | BL2, UNS, BL1     |
| TCGA.AO.A128, TCGA.EW.A3U0,<br>TCGA.OL.A66P               | RALGAPA2      | high              | IM, UNS, LAR      |
| TCGA.D8.A27M, TCGA.GM.A3XL,<br>TCGA.LL.A441               | PPP1R3F       | high              | UNS, IM, MSL      |
| TCGA.E2.A159, TCGA.EW.A1OV,<br>TCGA.GM.A2DI               | HIST1H2BC     | high              | BL2, UNS, NA      |

TCGA: The Cancer Genome Atlas; TNBC: triple negative breast cancer; sd: standard deviation; BL1: basal-like 1; BL2: basal-like 2; IM: immunomodulatory; M: mesenchymal, MSL: mesenchymal stem-like, LAR: luminal androgen receptor; UNS: unstable; NA: not applicable

**Table S4:** Subtype Classification of TCGA TNBC Samples with Mutation Frequency Differences:  
High vs. Low CD8 T Cells (0.25\*sd)

| Samples                                                                                                                 | Gene Mutation | High or Low Group | TNBC Subtypes                             |
|-------------------------------------------------------------------------------------------------------------------------|---------------|-------------------|-------------------------------------------|
| TCGA.AO.A128, TCGA.GM.A2DH,<br>TCGA.S3.AA15, TCGA.AR.A1AQ                                                               | ATG2B         | high              | IM, UNS, MSL, IM                          |
| TCGA.D8.A1XK, TCGA.EW.A3U0,<br>TCGA.D8.A27M, TCGA.BH.A0BG,<br>TCGA.C8.A26X, TCGA.A2.A0CM                                | PIKFYVE       | low               | BL1, UNS, UNS, UNS,<br>LAR, IM            |
| TCGA.BH.A18G, TCGA.D8.A1XK,<br>TCGA.C8.A26Y, TCGA.A1.A0SO,<br>TCGA.OL.A5RW, TCGA.D8.A147,<br>TCGA.BH.A0BL, TCGA.A2.A3XX | GOLGB1        | low               | UNS, BL1, LAR, UNS,<br>UNS, BL1, UNS, BL1 |
| TCGA.BH.A18G, TCGA.D8.A1XQ,<br>TCGA.A1.A0SO, TCGA.AN.A04D,<br>TCGA.A2.A3XT, TCGA.D8.A27F,<br>TCGA.A2.A3XY               | HUWE1         | low               | UNS, BL1, UNS, LAR,<br>NA, M, M           |
| TCGA.S3.AA15, TCGA.A2.A0CM,<br>TCGA.A2.A0SX                                                                             | NOTCH3        | high              | MSL, IM, BL2                              |
| TCGA.D8.A27M, TCGA.OL.A66P,<br>TCGA.E2.A1B6                                                                             | IGHV2-70      | high              | UNS, LAR, IM                              |
| TCGA.AO.A128, TCGA.A2.A04T,<br>TCGA.AR.A1AQ                                                                             | ZNF697        | high              | IM, BL1, IM                               |
| TCGA.C8.A26X, TCGA.A2.A0CM,<br>TCGA.E2.A14X                                                                             | TLR3          | high              | LAR, IM, BL1                              |
| TCGA.E2.A159, TCGA.EW.A1OV,<br>TCGA.A2.A04T                                                                             | SYBU          | high              | BL2, UNS, BL1                             |
| TCGA.AO.A128, TCGA.E2.A1LH,<br>TCGA.EW.A1OV                                                                             | SGIP1         | high              | IM, MSL, UNS                              |
| TCGA.AO.A128, TCGA.EW.A3U0,<br>TCGA.OL.A66P                                                                             | RALGAPA2      | high              | IM, UNS, LAR                              |
| TCGA.D8.A27M, TCGA.GM.A3XL,<br>TCGA.LL.A441                                                                             | PPP1R3F       | high              | UNS, IM, MSL                              |
| TCGA.E2.A1LH, TCGA.GM.A2DH,<br>TCGA.A2.A04Q                                                                             | PARP14        | high              | MSL, UNS, IM                              |
| TCGA.GM.A2DH, TCGA.OL.A66P,<br>TCGA.EW.A1P7                                                                             | LIMCH1        | high              | UNS, LAR, UNS                             |
| TCGA.E2.A159, TCGA.EW.A1OV,<br>TCGA.GM.A2DI                                                                             | HIST1H2BC     | high              | BL2, UNS, NA                              |
| TCGA.AO.A128, TCGA.E2.A1LH,<br>TCGA.E2.A573                                                                             | HEG1          | high              | IM, MSL, IM                               |
| TCGA.S3.AA10, TCGA.BH.A0BG,<br>TCGA.GM.A2DD                                                                             | FAM120C       | high              | IM, UNS, LAR                              |
| TCGA.AO.A128, TCGA.EW.A3U0,<br>TCGA.AO.A0J6                                                                             | ETV3L         | high              | IM, UNS, IM                               |
| TCGA.E2.A1LH, TCGA.GM.A2DD,<br>TCGA.A2.A0ST                                                                             | ARHGAP21      | high              | MSL, LAR, NA                              |

TCGA: The Cancer Genome Atlas; TNBC: triple negative breast cancer; sd: standard deviation; BL1: basal-like 1; BL2: basal-like 2; IM: immunomodulatory; M: mesenchymal, MSL: mesenchymal stem-like, LAR: luminal androgen receptor; UNS: unstable; NA: not applicable

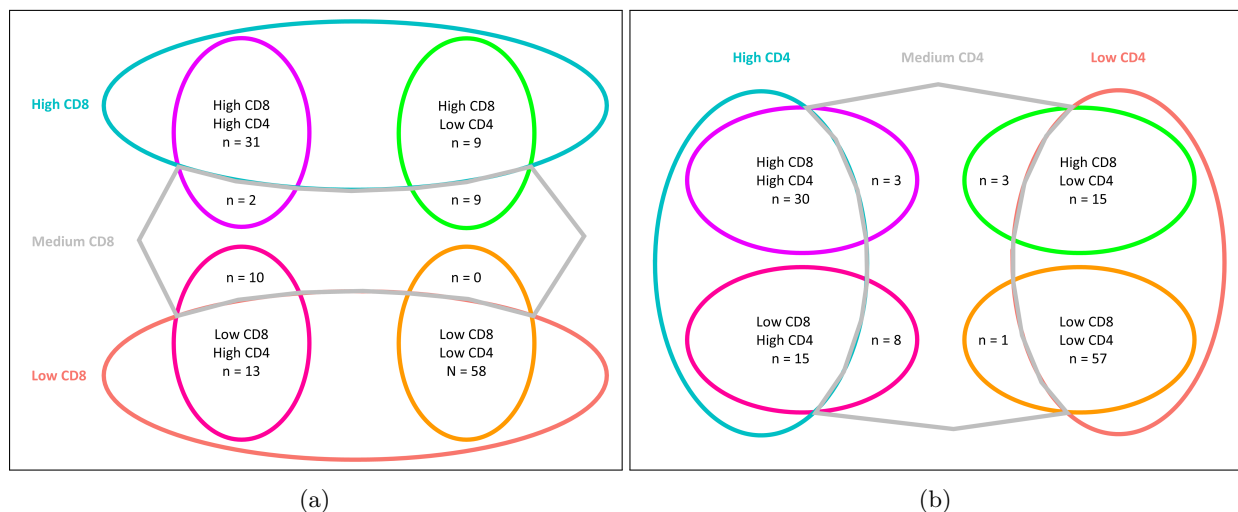

Figure S3: **Relationship of CD8 T cells and CD4 memory activated T cells in the two group vs. cluster analysis for TCGA.** (a) In the TCGA two group analysis, samples with high CD8 T cells are compared to samples with low CD8 T cells regardless of the CD4 memory activated T cell status. (b) In the TCGA two group analysis, samples with high CD4 memory activated T cells are compared to samples with low CD4 memory activated T cells regardless of the CD8 T cell status. (a) and (b) In the TCGA cluster analysis, only samples with both high CD8 T cells and high CD4 memory activated T cells (magenta) are compared to samples low in both cell types (orange). (a) and (b) Images generated with Microsoft Powerpoint (Office 365 ProPlus Version 2002) (<https://www.microsoft.com>).

**Table S5:** Subtypes of TCGA TNBC Patients

| Characteristic | TNBC Patients (n=133) | CD8 T Cells (0.25*sd)   |                        |                |                | CD8/CD4 T Cells (cluster analysis) |                        |                |                |
|----------------|-----------------------|-------------------------|------------------------|----------------|----------------|------------------------------------|------------------------|----------------|----------------|
|                |                       | High CD8 T Cells (n=40) | Low CD8 T Cells (n=71) | p              | fdr            | High CD8/High CD4 (n=33)           | Low CD8/Low CD4 (n=58) | p              | fdr            |
| TNBC Subtype   |                       |                         |                        | <b>8.4e-10</b> |                |                                    |                        | <b>6.4e-08</b> |                |
| BL1            | 17 (13%)              | 3 (8%)                  | 12 (17%)               | 0.16           | 0.63           | 3 (9%)                             | 7 (12%)                | 0.74           | 1              |
| BL2            | 11 (8%)               | 2 (5%)                  | 7 (10%)                | 0.48           | 1.00           | 2 (6%)                             | 6 (10%)                | 0.71           | 1              |
| IM             | 20 (15%)              | 17 (43%)                | 1 (1%)                 | <b>1.2e-07</b> | <b>8.5e-07</b> | 14 (42%)                           | 1 (2%)                 | <b>8.8e-07</b> | <b>6.2e-06</b> |
| LAR            | 17 (13%)              | 3 (8%)                  | 13 (18%)               | 0.10           | 0.50           | 3 (9%)                             | 11 (19%)               | 0.24           | 1              |
| M              | 25 (19%)              | 0 (0%)                  | 21 (30%)               | <b>1.1e-05</b> | <b>6.7e-05</b> | 0 (0%)                             | 21 (36%)               | <b>1.8e-05</b> | <b>1.1e-04</b> |
| MSL            | 11 (8%)               | 4 (10%)                 | 4 (6%)                 | 0.48           | 1              | 3 (9%)                             | 3 (5%)                 | 0.66           | 1              |
| UNS            | 23 (17%)              | 6 (15%)                 | 11 (15%)               | 1              | 1              | 4 (12%)                            | 7 (12%)                | 1              | 1              |
| NA             | 9 (7%)                | 5 (13%)                 | 2 (3%)                 |                |                | 4 (12%)                            | 2 (3%)                 |                |                |

TCGA: The Cancer Genome Atlas; TNBC: triple negative breast cancer; p: pvalue; sd: standard deviation; FDR: false discovery rate; BL1: basal-like 1; BL2: basal-like 2; IM: immunomodulatory; M: mesenchymal, MSL: mesenchymal stem-like, LAR: luminal androgen receptor; UNS: unstable; NA: not applicable; **Bold**: pvalue < 0.05

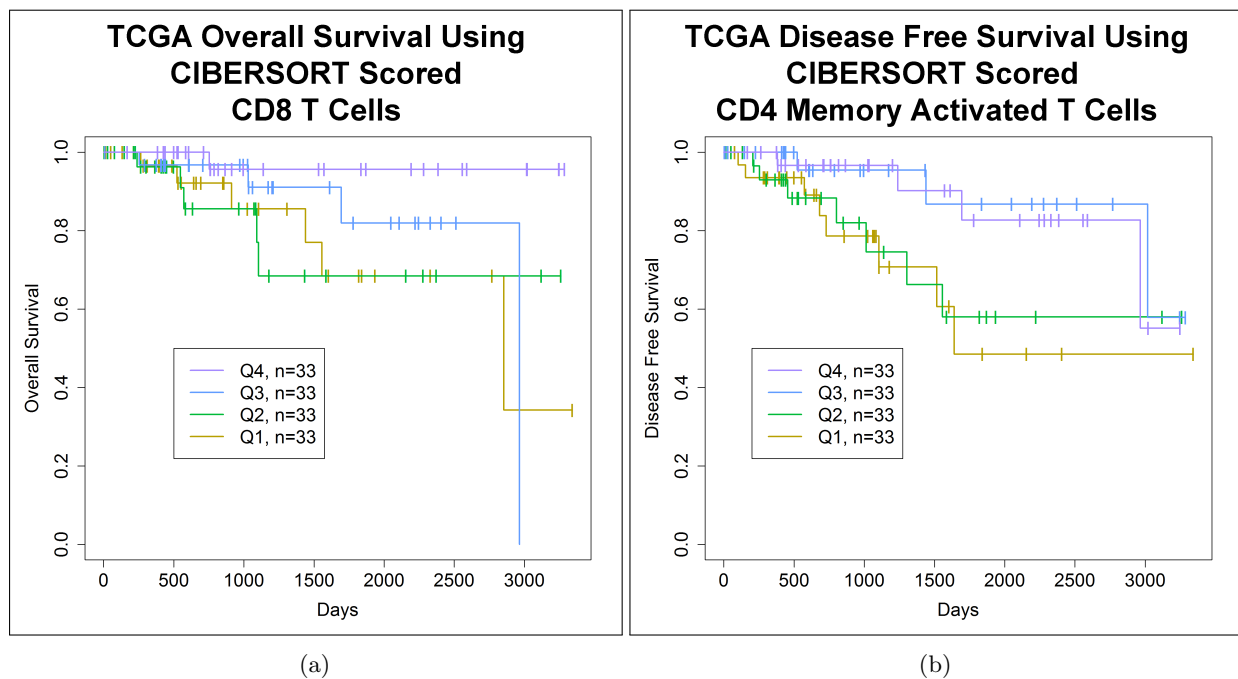

Figure S4: **Kaplan-Meier curves showing a trend towards improved OS or DFS in TCGA TNBC patients with high quantities of CD8 T cells or CD4 memory activated T cells in their tumor sample.** (a) Analysis of TCGA TNBC patients with a higher proportion of CD8 T cells in their tumor (quartiles 3 and 4) show a trend towards improved OS ( $p = 0.094$ ,  $FDR = 0.48$ , log rank test). (b) Analysis of TCGA TNBC patients with a higher proportion of CD4 memory activated T cells in their tumor sample (quartiles 3 and 4) show a trend towards improved DFS ( $p = 0.085$ ,  $FDR = 0.42$ , log rank test). (a) and (b) Cut offs of T cell infiltrate were based on quartiles. (a) and (b) Images generated with R 4.0.2 (<https://www.R-project.org>) [35].

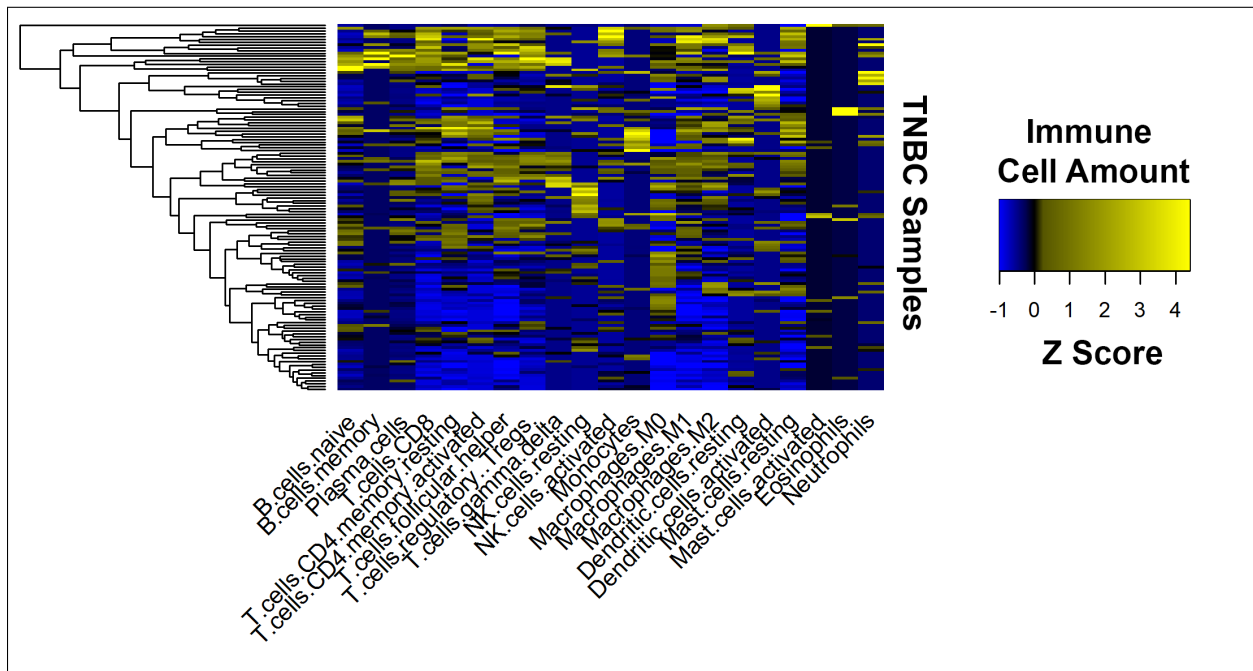

Figure S5: **Hierarchical clustering of all immune cell quantities in TCGA TNBC samples.** TCGA RNA-Seq gene expression data was analyzed with CIBERSORT to quantify the amount of different immune cells in the TNBC samples. Hierarchical clustering of these quantities after normalization is shown in the heatmap. Image generated with R's (4.0.2) (<https://www.R-project.org>) [35] gplots package (3.0.4) (<https://CRAN.R-project.org/package=gplots>) [36].



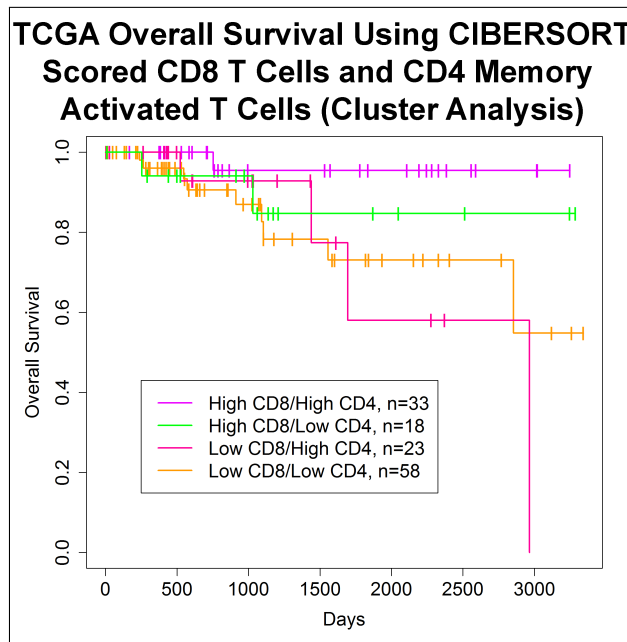

Figure S6: **Kaplan-Meier curve demonstrating improvements in OS in TCGA TNBC patients with high quantities of CD8 T cells and CD4 memory activated T cells in their tumor sample.** TCGA TNBC patients with a higher amount of CD8 T cells and CD4 memory activated T cells in their tumor (magenta) as compared to samples with a lower amount of both these cell types (orange) have a better OS ( $p = 0.037$ ,  $FDR = 0.11$ , log rank test) (survival rates high vs. low, 5 year: 95.5% and 73.1%, 10 year: 95.5% and 54.8%). The clusters were identified according to the hierarchical clustering analysis in figure 5. Image generated with R 4.0.2 (<https://www.R-project.org>) [35].

**Table S6:** Comparison of TCGA and METABRIC TNBC Patients

| Characteristic                   | TCGA TNBC Patients<br>(n=133) | METABRIC TNBC Patients<br>(n=199) | P              |
|----------------------------------|-------------------------------|-----------------------------------|----------------|
| Mean Age at Pathologic Diagnosis | 54.7                          | 53.9                              | 0.57*          |
| Pathologic Stage                 |                               |                                   | 0.09#          |
| I-II                             | 110<br>(83%)                  | 129<br>(65%)                      | Y              |
| III-IV                           | 20<br>(15%)                   | 12<br>(6%)                        | Y              |
| NA                               | 3<br>(2%)                     | 58<br>(29%)                       | N              |
| Menopause                        |                               |                                   | 0.05#          |
| Pre                              | 35<br>(26%)                   | 82<br>(41%)                       | Y              |
| Post                             | 82<br>(62%)                   | 117<br>(59%)                      | Y              |
| NA                               | 16<br>(12%)                   | 0<br>(0%)                         | N              |
| Chemotherapy                     |                               |                                   | <b>0.0006#</b> |
| Yes                              | 103<br>(77%)                  | 117<br>(59%)                      | Y              |
| No/NA                            | 30<br>(23%)                   | 82<br>(41%)                       | Y              |
| Positive Lymph Node              |                               |                                   | <b>0.01#</b>   |
| Yes                              | 49<br>(37%)                   | 100<br>(50%)                      | Y              |
| No                               | 84<br>(63%)                   | 96<br>(48%)                       | Y              |
| NA                               | 0<br>(0%)                     | 3<br>(2%)                         | N              |

TCGA: The Cancer Genome Atlas; METABRIC: Molecular Taxonomy of Breast Cancer International Consortium; TNBC: triple negative breast cancer; p: pvalue; \*: Wilcoxon test; #: Fisher's exact test; Y: Used in Fisher's exact test; N: Not used for Fisher's exact test; NA: missing data; **Bold**: pvalue < 0.05

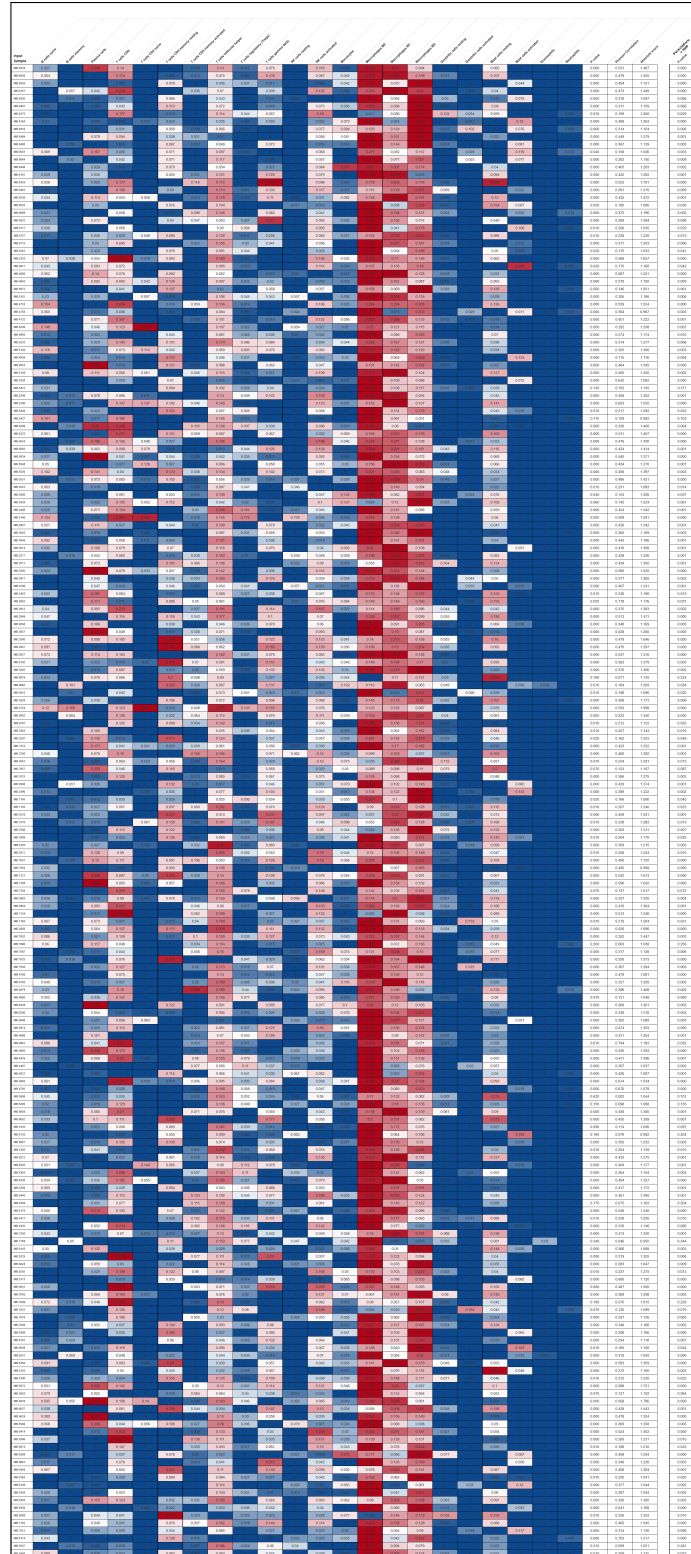

Figure S7: **Quantification of immune cell infiltrate by CIBERSORT analysis of microarray gene expression data from METABRIC TNBC cases.** The heatmap returned by CIBERSORT shows the quantities of 22 different immune cell types among the 196 METABRIC TNBC samples. CIBERSORT assigns a score of arbitrary units that reflects the absolute proportion of each cell type in a mixture. A higher score would indicate a higher proportion of that cell type. The far right column indicates the pvalue when 1000 permutations are used instead of 100. Image generated with CIBERSORT (<https://cibersort.stanford.edu>) [29].

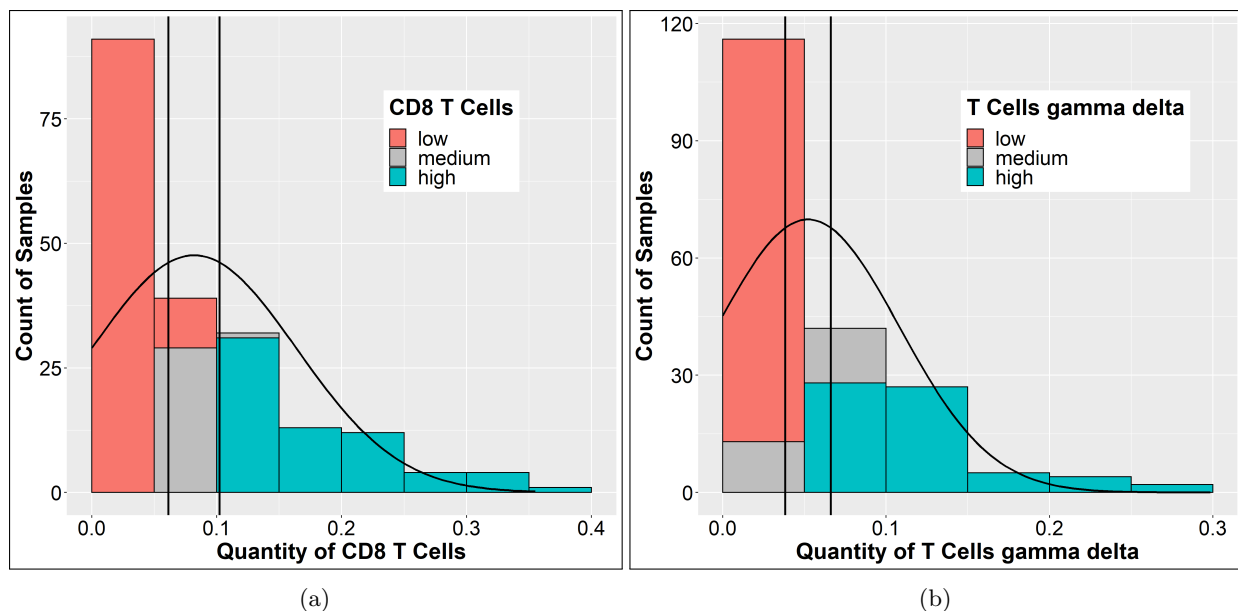

Figure S8: **Distribution of the proportion of CD8 T cells or gamma delta T cells across the METABRIC TNBC cases.** A histogram of the quantity of (a) CD8 T cells or (b) gamma delta T cells present across the different METABRIC TNBC samples was plotted using data generated by CIBERSORT. CIBERSORT assigns a score of arbitrary units that reflects the absolute proportion of each cell type in a mixture. A higher score would indicate a higher proportion of that cell type. Vertical lines represent the cut off ( $\pm 0.25 * \text{standard deviation}$ ) used to create the “high” and “low” groups. (a) and (b) Images generated with R 4.0.2 (<https://www.R-project.org>) [35].

**Table S7:** Prognostic Value of Immune Cell Types in METABRIC TNBC Patients (Kaplan-Meier log rank test)

| Cell Type           | High vs. Low Cut Off | Low Cut Off            | High Cut Off           | Low Number | High Number | OS pvalue    | OS FDR |
|---------------------|----------------------|------------------------|------------------------|------------|-------------|--------------|--------|
| CD8 T Cells         | 0.25*sd              | 0.0613                 | 0.1023                 | 101        | 65          | 0.979        | 0.98   |
| CD8 T Cells         | median               | 0.0581                 | 0.0581                 | 98         | 98          | 0.673        | 0.78   |
| CD8 T Cells         | mean                 | 0.0818                 | 0.0818                 | 118        | 78          | 0.773        | 0.94   |
| CD8 T Cells         | 0.5*sd               | 0.0407                 | 0.1228                 | 79         | 50          | 0.681        | 0.97   |
| CD8 T Cells         | quartiles            | 0.0000, 0.0175, 0.0581 | 0.0581, 0.1233, 0.3552 | 49, 49     | 49, 49      | 0.238        | 0.51   |
| gamma delta T Cells | 0.25*sd              | 0.0382                 | 0.0662                 | 103        | 66          | <b>0.006</b> | 0.12   |
| gamma delta T Cells | median               | 0.0362                 | 0.0362                 | 98         | 98          | <b>0.007</b> | 0.10   |
| gamma delta T Cells | mean                 | 0.0522                 | 0.0522                 | 116        | 80          | <b>0.011</b> | 0.23   |
| gamma delta T Cells | 0.5*sd               | 0.0242                 | 0.0801                 | 78         | 48          | <b>0.008</b> | 0.13   |
| gamma delta T Cells | quartiles            | 0.0000, 0.0035, 0.0362 | 0.0362, 0.0792, 0.2986 | 49, 49     | 49, 49      | 0.0521       | 0.16   |

METABRIC: Molecular Taxonomy of Breast Cancer International Consortium; TNBC: triple negative breast cancer; OS: overall survival; sd: standard deviation; FDR: false discovery rate; **Bold:** pvalue < 0.05

**Table S8:** Survival Rates of METABRIC TNBC Patients (Kaplan-Meier)

| Years | OS High CD8 T Cells<br>(0.25*sd) | OS Low CD8 T Cells<br>(0.25*sd) | OS High T Cells<br>gamma delta (0.25*sd) | OS Low T Cells<br>gamma delta (0.25*sd) |
|-------|----------------------------------|---------------------------------|------------------------------------------|-----------------------------------------|
| 5     | 66.2%                            | 63.5%                           | 73.9%                                    | 56.6%                                   |
| 7     | 62.9%                            | 53.9%                           | 72.3%                                    | 48.0%                                   |
| 10    | 55.6%                            | 50.3%                           | 67.3%                                    | 42.0%                                   |
| 15    | 43.9%                            | 47.1%                           | 61.3%                                    | 37.6%                                   |
| 20    | 36.6%                            | 47.1%                           | 58.0%                                    | 35.4%                                   |

METABRIC: Molecular Taxonomy of Breast Cancer International Consortium; TNBC: triple negative breast cancer; OS: overall survival; sd: standard deviation

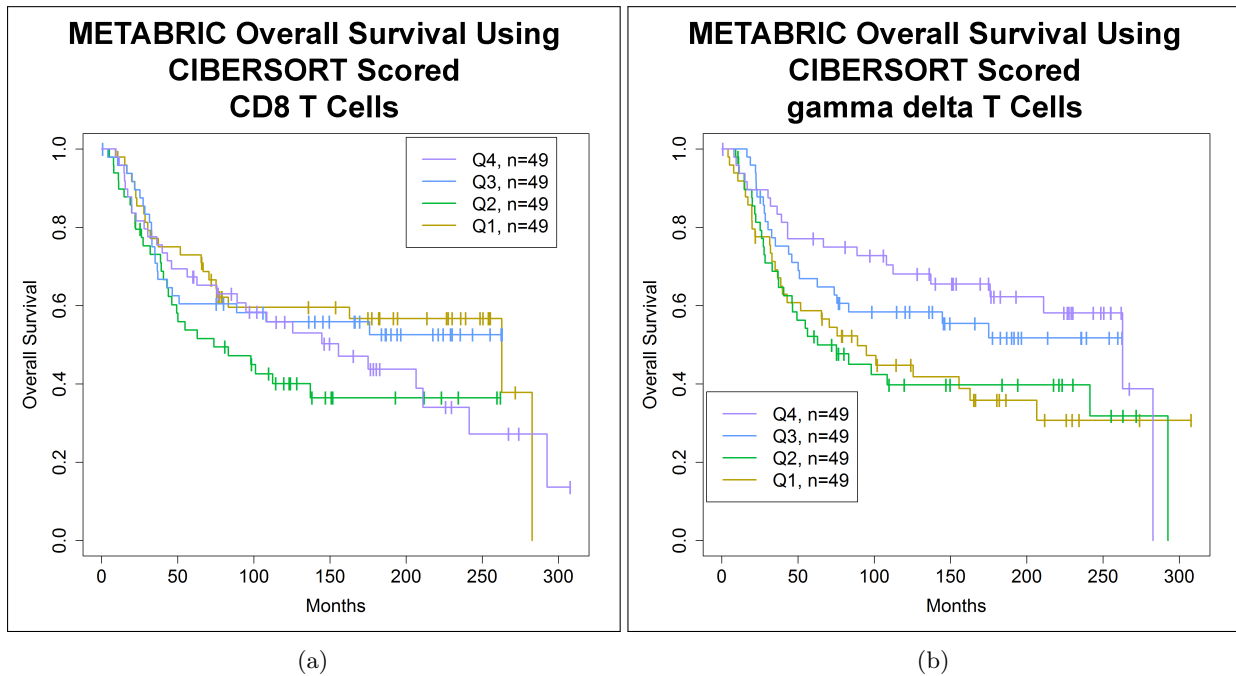

Figure S9: **Kaplan-Meier curves showing a trend towards improved OS in METABRIC TNBC patients with high quantities of gamma delta T cells in their tumor sample.** (a) Analysis of METABRIC TNBC patients with a higher proportion of CD8 T cells in their tumor (quartiles 3 and 4) do not have a better OS ( $p = 0.238$ ,  $FDR = 0.51$ , log rank test). (b) Analysis of METABRIC TNBC patients with a higher proportion of gamma delta T cells in their tumor sample (quartiles 3 and 4) show a trend towards improved OS ( $p = 0.052$ ,  $FDR = 0.16$ , log rank test). (a) and (b) Cut offs of T cell infiltrate were based on quartiles. (a) and (b) Images generated with R 4.0.2 (<https://www.R-project.org>) [35].

**Table S9:** Subtypes of METABRIC TNBC Patients

| Characteristic | TNBC Patients<br>(n=199) | CD8 T Cells<br>(0.25*sd)      |                               |                |                | T Cells gamma delta<br>(0.25*sd)            |                                             |               |       |
|----------------|--------------------------|-------------------------------|-------------------------------|----------------|----------------|---------------------------------------------|---------------------------------------------|---------------|-------|
|                |                          | High CD8<br>T Cells<br>(n=65) | Low CD8<br>T Cells<br>(n=101) | p              | fdr            | High T<br>Cells<br>gamma<br>delta<br>(n=66) | Low T<br>Cells<br>gamma<br>delta<br>(n=103) | p             | fdr   |
| TNBC Subtype   |                          |                               |                               | <b>8.9e-05</b> |                |                                             |                                             | 0.16          |       |
| BL1            | 29<br>(15%)              | 7<br>(11%)                    | 15<br>(15%)                   | 0.49           | 1              | 10<br>(15%)                                 | 15<br>(15%)                                 | 0.65          | 1     |
| BL2            | 14<br>(7%)               | 4<br>(6%)                     | 8<br>(8%)                     | 0.77           | 1              | 4<br>(6%)                                   | 9<br>(9%)                                   | 0.38          | 1     |
| IM             | 45<br>(23%)              | 26<br>(40%)                   | 9<br>(9%)                     | <b>3.3e-06</b> | <b>2.3e-05</b> | 17<br>(26%)                                 | 19<br>(18%)                                 | 0.17          | 1     |
| LAR            | 18<br>(9%)               | 5<br>(8%)                     | 12<br>(12%)                   | 0.44           | 1              | 8<br>(12%)                                  | 9<br>(9%)                                   | 0.58          | 1     |
| M              | 38<br>(19%)              | 6<br>(9%)                     | 31<br>(31%)                   | <b>0.0011</b>  | <b>0.0065</b>  | 6<br>(9%)                                   | 27<br>(26%)                                 | <b>0.0089</b> | 0.063 |
| MSL            | 10<br>(5%)               | 4<br>(6%)                     | 3<br>(3%)                     | 0.43           | 1              | 6<br>(9%)                                   | 4<br>(4%)                                   | 0.34          | 1     |
| UNS            | 33<br>(17%)              | 10<br>(15%)                   | 18<br>(18%)                   | 0.83           | 1              | 12<br>(18%)                                 | 15<br>(15%)                                 | 0.42          | 1     |
| NA             | 12<br>(6%)               | 3<br>(5%)                     | 5<br>(5%)                     |                |                | 3<br>(5%)                                   | 5<br>(5%)                                   |               |       |

METABRIC: Molecular Taxonomy of Breast Cancer International Consortium; TNBC: triple negative breast cancer; p: pvalue; sd: standard deviation; FDR: false discovery rate; BL1: basal-like 1; BL2: basal-like 2; IM: immunomodulatory; M: mesenchymal, MSL: mesenchymal stem-like, LAR: luminal androgen receptor; UNS: unstable; NA: not applicable;

**Bold:** pvalue < 0.05

**Table S10:** 133 TCGA TNBC Cases

| Bar-code        | % TILs | CD8 T Cells | CD4 Memory Activated T Cells | Sub-type | ER IHC | PR IHC | HER2 IHC | HER2 IHC Level | HER2 FISH | Pathologic Stage | Age | Ethnicity | Menopausal status | Chemotherapy | LN + | OS Status | OS Days | DFS Status | DFS Days |
|-----------------|--------|-------------|------------------------------|----------|--------|--------|----------|----------------|-----------|------------------|-----|-----------|-------------------|--------------|------|-----------|---------|------------|----------|
| TCGA-A2<br>A1G6 |        | 0.213       | 0.000                        | NA       | Neg    | Neg    | Neg      | 1+             |           | IIIA             | 50  | C         | Pre               | Y            | Pos  | 0         | 501     | 0          | 501      |
| TCGA-C8<br>A12V | 10-20% | 0.578       | 0.105                        | IM       | Neg    | Neg    | Neg      |                |           | IIA              | 55  |           | Post              |              | Neg  | 0         | 385     | 0          | 385      |
| TCGA-GH<br>A2C9 | <1%    | 0.025       | 0.000                        | M        | Neg    | Neg    | Neg      |                |           | IIB              | 58  | AA        | Post              |              | Neg  | 0         | 3342    | 0          | 3342     |
| TCGA-A7<br>A6VV |        | 0.017       | 0.000                        | M        | Neg    | Neg    | Neg      |                |           | IIA              | 51  | AA        |                   | Y            | Neg  | 0         | 313     | 0          | 313      |
| TCGA-D8<br>A27H | <1%    | 0.010       | 0.000                        | M        | Neg    | Neg    | Neg      |                |           | IIA              | 72  | C         | Post              | Y            | Neg  | 0         | 397     | 0          | 397      |
| TCGA-EW<br>A10W | 10-20% | 0.014       | 0.005                        | M        | Neg    | Neg    | Neg      | 1+             |           | IIA              | 58  | AA        | Post              | Y            | Neg  | 0         | 694     | 0          | 694      |
| TCGA-D8<br>A1XQ | 1-10%  | 0.085       | 0.042                        | BL1      | Neg    | Neg    | Neg      | 1+             |           | IIA              | 69  | C         | Post              |              | Neg  | 0         | 499     | 0          | 499      |
| TCGA-E2<br>A1L1 | 1-10%  | 0.035       | 0.014                        | BL1      | Neg    | Neg    | Equiv    |                | Neg       | IIB              | 57  | C         | Post              | Y            | Pos  | 0         | 3121    | 0          | 3121     |
| TCGA-BH<br>A0BG | 20-30% | 0.222       | 0.021                        | UNS      | Neg    | Neg    | Neg      |                |           | I                | 73  | C         | Post              |              | Neg  | 0         | 1871    | 0          | 1871     |

TCGA: The Cancer Genome Atlas; TNBC: triple negative breast cancer; Cluster assignment: high in both T cells, high in CD8 T cells only, high in CD4 memory activated T cells only, low in both T cells; TIL: tumor infiltrating lymphocyte; High quantity of T Cells: > 0.25\*standard deviation; Low quantity of T Cells: < 0.25\*standard deviation; ER: estrogen receptor; IHC: immunohistochemistry; Pos: Positive; Neg: negative; PR: progesterone receptor; HER2: human epidermal growth factor receptor 2; Equiv: equivocal; Indet: indeterminate; FISH: fluorescence in situ hybridization; C: Caucasian; AA: African American; LN +: Lymph Node Positive; Y: Yes; OS: overall survival; DFS: disease free survival; BL1: basal-like 1; BL2: basal-like 2; IM: immunomodulatory; M: mesenchymal, MSL: mesenchymal stem-like, LAR: luminal androgen receptor; UNS: unstable; NA: not applicable

**Table S10:** 133 TCGA TNBC Cases

| Bar-code       | % TILs | CD8 T Cells | CD4 Memory Activated T Cells | Sub-type | ER IHC | PR IHC | HER2 IHC Level | HER2 FISH | Pathologic Stage | Age | Ethnicity | Menopausal status | Chemotherapy | LN + | OS Status | OS Days | DFS Status | DFS Days |
|----------------|--------|-------------|------------------------------|----------|--------|--------|----------------|-----------|------------------|-----|-----------|-------------------|--------------|------|-----------|---------|------------|----------|
| TCGA-A1AN-A0AR | 1-10%  | 0.026       | 0.000                        | LAR      | Neg    | Neg    | 0              |           | IIA              | 55  | C         | Pre               |              | Neg  | 0         | 10      | 0          | 10       |
| TCGA-LL-A441   |        | 0.242       | 0.064                        | MSL      | Neg    | Neg    | 1+             |           | IA               | 62  | AA        | Post              | Y            | Neg  | 0         | 996     | 0          | 996      |
| TCGA-A2-A04Q   | 10-20% | 0.321       | 0.150                        | IM       | Neg    | Neg    | 2+             | Neg       | IA               | 48  | C         | Post              | Y            | Neg  | 0         | 2385    | 0          | 2385     |
| TCGA-D8-A27F   | 1-10%  | 0.007       | 0.003                        | M        | Neg    | Neg    | 1+             |           | IIA              | 40  | C         | Pre               | Y            | Neg  | 0         | 488     | 0          | 488      |
| TCGA-A7-A0DA   | <1%    | 0.029       | 0.000                        | M        | Neg    | Neg    | 1+             |           | IIA              | 62  | C         | Post              | Y            | Neg  | 0         | 1085    | 0          | 1085     |
| TCGA-LL-A5YQ   | 10-20% | 0.407       | 0.188                        | IM       | Neg    | Neg    | 1+             |           | IA               | 50  | AA        | Pre               | Y            | Neg  | 0         | 440     | 0          | 440      |
| TCGA-C8-A26Y   | <1%    | 0.017       | 0.000                        | LAR      | Neg    | Neg    | 1+             |           | IIA              | 90  |           | Post              |              | Neg  | 0         | 394     | 0          | 394      |
| TCGA-D8-A11J   | 1-10%  | 0.141       | 0.078                        | UNS      | Neg    | Neg    | 1+             |           | IIA              | 72  | C         | Post              |              | Neg  | 0         | 611     | 0          | 611      |
| TCGA-OL-A5D7   |        | 0.188       | 0.126                        | IM       | Neg    | Neg    |                | Neg       | IIA              | 70  | AA        | Post              | Y            | Neg  | 0         | 1780    | 0          | 1780     |
| TCGA-AO-A0J2   | 10-20% | 0.090       | 0.063                        | LAR      | Neg    | Neg    | 2+             | Neg       | IA               | 41  | C         | Pre               | Y            | Neg  | 0         | 997     | 0          | 997      |

TCGA: The Cancer Genome Atlas; TNBC: triple negative breast cancer; Cluster assignment: **high in both T cells**, **high in CD8 T cells only**, **high in CD4 memory activated T cells only**, **low in both T cells**; TIL: tumor infiltrating lymphocyte; **High quantity of T Cells: > 0.25\*standard deviation**; **Low quantity of T Cells: < 0.25\*standard deviation**; ER: estrogen receptor; IHC: immunohistochemistry; Pos: Positive; Neg: negative; PR: progesterone receptor; HER2: human epidermal growth factor receptor 2; Equiv: equivocal; Indet: indeterminate; FISH: fluorescence in situ hybridization; C: Caucasian; AA: African American; LN +: Lymph Node Positive; Y: Yes; OS: overall survival; DFS: disease free survival; BL1: basal-like 1; BL2: basal-like 2; IM: immunomodulatory; M: mesenchymal, MSL: mesenchymal stem-like, LAR: luminal androgen receptor; UNS: unstable; NA: not applicable



**Table S10:** 133 TCGA TNBC Cases

| Bar-code     | % TILs | CD8 T Cells | CD4 Memory Activated T Cells | Sub-type | ER IHC | PR IHC | HER2 IHC | HER2 IHC Level | HER2 FISH | Pathologic Stage | Age | Ethnicity | Menopause | Chemotherapy | LN + | OS Status | OS Days | DFS Status | DFS Days |
|--------------|--------|-------------|------------------------------|----------|--------|--------|----------|----------------|-----------|------------------|-----|-----------|-----------|--------------|------|-----------|---------|------------|----------|
| TCGA-A2-A0D2 | 20-30% | 0.163       | 0.088                        | M        | Neg    | Neg    | Neg      | 0              | Neg       | IIA              | 45  | C         | Pre       | Y            | Neg  | 0         | 1027    | 0          | 1027     |
| TCGA-AR-A0TU | 10-20% | 0.166       | 0.158                        | BL1      | Neg    | Neg    | Neg      | 1+             | Neg       | IIA              | 35  | C         | Pre       | Y            | Neg  | 0         | 709     | 0          | 709      |
| TCGA-AR-A0U1 |        |             |                              |          | Neg    | Neg    | Neg      | 1+             | Neg       | IIB              | 36  | C         | Pre       | Y            | Pos  | 0         | 4052    | 0          | 4052     |
| TCGA-AN-A0XC | 10-20% | 0.104       | 0.072                        | UNS      | Neg    | Neg    | Neg      |                | Neg       | IIA              | 54  | C         | Post      |              | Neg  | 0         | 10      | 0          | 10       |
| TCGA-OL-A5RW |        |             |                              |          | Neg    | Neg    | Neg      |                | Neg       | IIA              | 40  | AA        | Pre       | Y            | Pos  | 0         | 1106    | 0          | 1106     |
| TCGA-EW-A6SB | 40-50% | 0.238       | 0.106                        | IM       | Neg    | Neg    | Neg      |                |           | II               | 62  | AA        |           |              | Neg  | 0         | 760     | 0          | 760      |
| TCGA-AO-A0J4 | 1-10%  | 0.083       | 0.021                        | BL1      | Neg    | Neg    | Neg      |                |           | IA               | 41  | AA        | Pre       | Y            | Neg  | 0         | 1587    | 0          | 1587     |
| TCGA-AQ-A54N | <1%    | 0.060       | 0.000                        | LAR      | Neg    | Neg    | Equiv    | 2+             | Neg       | IIA              | 51  | AA        | Post      |              | Neg  | 0         | 78      | 0          | 78       |
| TCGA-AR-A1AY | 1-10%  | 0.016       | 0.000                        | M        | Neg    | Neg    | Neg      |                |           | I                | 65  | C         | Post      | Y            | Neg  | 0         | 1026    | 0          | 1026     |
| TCGA-AR-A0U4 | 10-20% | 0.030       | 0.008                        | IM       | Neg    | Neg    | Neg      |                |           | IIA              | 54  | C         | Pre       | Y            | Neg  | 0         | 3261    | 0          | 3261     |

TCGA: The Cancer Genome Atlas; TNBC: triple negative breast cancer; Cluster assignment: **high in both T cells**, **high in CD8 T cells only**, **high in CD4 memory activated T cells only**; **low in both T cells**; TIL: tumor infiltrating lymphocyte; **High quantity of T Cells: > 0.25\*standard deviation**; **Low quantity of T Cells: < 0.25\*standard deviation**; ER: estrogen receptor; IHC: immunohistochemistry; Pos: Positive; Neg: negative; PR: progesterone receptor; HER2: human epidermal growth factor receptor 2; Equiv: equivocal; Indet: indeterminate; FISH: fluorescence in situ hybridization; C: Caucasian; AA: African American; LN +: Lymph Node Positive; Y: Yes; OS: overall survival; DFS: disease free survival; BL1: basal-like 1; BL2: basal-like 2; IM: immunomodulatory; M: mesenchymal, MSL: mesenchymal stem-like, LAR: luminal androgen receptor; UNS: unstable; NA: not applicable

**Table S10:** 133 TCGA TNBC Cases

| Bar-code     | % TILs | CD8 T Cells | CD4 Memory Activated T Cells | Sub-type | ER IHC | PR IHC | HER2 IHC | HER2 IHC Level | HER2 FISH | Pathologic Stage | Age | Ethnicity | Menopausal status | Chemotherapy | LN + | OS Status | OS Days | DFS Status | DFS Days |
|--------------|--------|-------------|------------------------------|----------|--------|--------|----------|----------------|-----------|------------------|-----|-----------|-------------------|--------------|------|-----------|---------|------------|----------|
| TCGA-E2-A1L7 |        | 0.264       | 0.053                        | NA       | Neg    | Neg    | Neg      |                | Neg       | IIIA             | 40  | C         | Pre               | Y            | Pos  | 0         | 1836    | 0          | 1836     |
| TCGA-E2-A574 | <1%    | 0.033       | 0.000                        | M        | Neg    | Neg    | Equiv    | 2+             | Neg       | IIA              | 44  | AA        | Pre               | Y            | Neg  | 0         | 1179    | 0          | 1179     |
| TCGA-BH-A18G | <1%    | 0.062       | 0.026                        | UNS      | Neg    | Neg    | Neg      |                | Neg       | IA               | 81  | C         | Post              |              | Neg  | 0         | 149     | 0          | 149      |
| TCGA-A1-A0SO | 1-10%  | 0.016       | 0.006                        | UNS      | Neg    | Neg    | Equiv    |                | Neg       | IIB              | 67  | C         | Post              |              | Pos  | 0         | 852     | 0          | 852      |
| TCGA-OL-A661 | 1-10%  | 0.559       | 0.151                        | IM       | Neg    | Neg    | Neg      |                | Neg       | IIA              | 36  | AA        |                   | Y            | Pos  | 0         | 714     | 0          | 714      |
| TCGA-A7-A45E | 1-10%  | 0.014       | 0.000                        | BL2      | Neg    | Neg    | Neg      | 1+             | Neg       | IIA              | 54  | AA        | Post              | Y            | Neg  | 0         | 644     | 0          | 644      |
| TCGA-BH-A0E6 |        | 0.162       | 0.000                        | UNS      | Neg    | Neg    | Equiv    | 2+             | Neg       | IA               | 69  | C         | Post              | Y            | Neg  | 0         | 293     | 0          | 293      |
| TCGA-OL-A6VO | <1%    | 0.016       | 0.000                        | BL1      | Neg    | Neg    | Neg      |                | Neg       | IA               | 43  | AA        |                   | Y            | Neg  | 0         | 858     | 0          | 858      |
| TCGA-A2-A0T2 | 1-10%  | 0.136       | 0.016                        | UNS      | Neg    | Neg    | Neg      | 0              | Neg       | IV               | 66  | C         | Post              | Y            | Pos  | 1         | 255     | 1          | 255      |
| TCGA-BH-A0RX |        | 0.371       | 0.112                        | NA       | Neg    | Neg    | Neg      | 1+             | Neg       | IIA              | 59  | C         | Post              | Y            | Neg  | 0         | 170     | 0          | 170      |

TCGA: The Cancer Genome Atlas; TNBC: triple negative breast cancer; Cluster assignment: **high in both T cells**, **high in CDS T cells only**, **high in CD4 memory activated T cells only**, **low in both T cells**; TIL: tumor infiltrating lymphocyte; **High quantity of T Cells: > 0.25\*standard deviation**; **Low quantity of T Cells: < 0.25\*standard deviation**; ER: estrogen receptor; IHC: immunohistochemistry; Pos: Positive; Neg: negative; PR: progesterone receptor; HER2: human epidermal growth factor receptor 2; Equiv: equivocal; Indet: indeterminate; FISH: fluorescence in situ hybridization; C: Caucasian; AA: African American; LN +: Lymph Node Positive; Y: Yes; OS: overall survival; DFS: disease free survival; BL1: basal-like 1; BL2: basal-like 2; IM: immunomodulatory; M: mesenchymal, MSL: mesenchymal stem-like, LAR: luminal androgen receptor; UNS: unstable; NA: not applicable

**Table S10:** 133 TCGA TNBC Cases

| Bar-code     | % TILs | CD8 T Cells | CD4 Memory Activated T Cells | Sub-type | ER IHC | PR IHC | HER2 IHC | HER2 IHC Level | HER2 FISH | Pathologic Stage | Age | Ethnicity | Menopausal status | Chemotherapy | LN + | OS Status | OS Days | DFS Status | DFS Days |
|--------------|--------|-------------|------------------------------|----------|--------|--------|----------|----------------|-----------|------------------|-----|-----------|-------------------|--------------|------|-----------|---------|------------|----------|
| TCGA-D8-A137 | 1-10%  | 0.045       | 0.039                        | BL2      | Neg    | Neg    | Neg      | 1+             |           |                  | 51  | C         | Post              | Y            | Pos  | 0         | 635     | 0          | 635      |
| TCGA-E2-A159 |        | 0.292       | 0.211                        | BL2      | Neg    | Neg    | Neg      |                | Neg       | IIA              | 50  | C         | Pre               | Y            | Neg  | 0         | 762     | 0          | 762      |
| TCGA-D8-A143 | 40-50% | 0.109       | 0.041                        | M        | Neg    | Neg    | Neg      | 1+             |           | IIA              | 51  | C         | Post              | Y            | Neg  | 0         | 431     | 0          | 431      |
| TCGA-E2-A14N | <1%    | 0.061       | 0.064                        | UNS      | Neg    | Neg    | Neg      |                |           | IIB              | 37  | C         | Pre               | Y            | Pos  | 0         | 1434    | 0          | 1434     |
| TCGA-A2-A3XU | 1-10%  | 0.018       | 0.000                        | M        | Neg    | Neg    | Neg      |                | Neg       | IIB              | 35  | AA        | Post              | Y            | Pos  | 1         | 912     | 1          | 574      |
| TCGA-A2-A3X1 | 1-10%  | 0.002       | 0.027                        | NA       | Neg    | Neg    | Neg      |                | Neg       | IIB              | 45  | AA        | Pre               | Y            | Pos  | 0         | 2770    | 0          | 2770     |
| TCGA-AO-A128 | 20-30% | 0.691       | 0.308                        | IM       | Neg    | Neg    | Neg      | 0              | Neg       | IIA              | 61  | C         | Post              | Y            | Neg  | 0         | 3248    | 0          | 3248     |
| TCGA-B6-A409 | 1-10%  | 0.060       | 0.007                        | LAR      | Neg    | Neg    | Equiv    | 1+             | Neg       | IIIA             | 44  | AA        | Pre               | Y            | Pos  | 1         | 573     | 1          | 456      |
| TCGA-D8-A27M | 1-10%  | 0.176       | 0.114                        | UNS      | Neg    | Neg    | Neg      |                |           | IA               | 59  | C         | Post              | Y            | Neg  | 0         | 410     | 0          | 410      |
| TCGA-E2-A1LK | <1%    | 0.018       | 0.000                        | UNS      | Neg    | Neg    | Equiv    | 2+             | Neg       | IIIC             | 84  | AA        | Post              |              | Pos  | 1         | 266     | 1          | 155      |

TCGA: The Cancer Genome Atlas; TNBC: triple negative breast cancer; Cluster assignment: **high in both T cells**, **high in CD8 T cells only**, **high in CD4 memory activated T cells only**, **low in both T cells**; TIL: tumor infiltrating lymphocyte; **High quantity of T Cells: > 0.25\*standard deviation**; **Low quantity of T Cells: < 0.25\*standard deviation**; ER: estrogen receptor; IHC: immunohistochemistry; Pos: Positive; Neg: negative; PR: progesterone receptor; HER2: human epidermal growth factor receptor 2; Equiv: equivocal; Indet: indeterminate; FISH: fluorescence in situ hybridization; C: Caucasian; AA: African American; LN +: Lymph Node Positive; Y: Yes; OS: overall survival; DFS: disease free survival; BL1: basal-like 1; BL2: basal-like 2; IM: immunomodulatory; M: mesenchymal, MSL: mesenchymal stem-like, LAR: luminal androgen receptor; UNS: unstable; NA: not applicable

**Table S10:** 133 TCGA TNBC Cases

| Bar-code        | % TILs | CD8 T Cells | CD4 Memory Activated T Cells | Sub-type | ER IHC | PR IHC | HER2 IHC | HER2 IHC Level | HER2 FISH | Pathologic Stage | Age | Ethnicity | Menopausal status | Chemotherapy | LN + | OS Status | OS Days | DFS Status | DFS Days |
|-----------------|--------|-------------|------------------------------|----------|--------|--------|----------|----------------|-----------|------------------|-----|-----------|-------------------|--------------|------|-----------|---------|------------|----------|
| TCGA-A7AN-A0A1  | 30-40% | 0.102       | 0.024                        | M        | Neg    | Neg    | Neg      |                | Neg       | IIA              | 62  | C         | Post              |              | Neg  | 0         | 10      | 0          | 10       |
| TCGA-L7LL-A740  | <1%    | 0.004       | 0.020                        | LAR      | Neg    | Neg    | Equiv    | 2+             | Neg       | IA               | 61  | AA        | Post              | Y            | Neg  | 0         | 441     | 0          | 441      |
| TCGA-A7A7-A6VW  |        | 0.010       | 0.000                        | BL2      | Neg    | Neg    | Neg      |                | Neg       | IIA              | 48  | AA        | Post              | Y            | Neg  | 0         | 285     | 0          | 285      |
| TCGA-A7AN-A04D  |        | 0.021       | 0.001                        | LAR      | Neg    | Neg    | Neg      | 0              | Neg       | IIB              | 58  | C         | Post              |              | Pos  | 0         | 52      | 0          | 52       |
| TCGA-A7AO-A0J6  | 20-30% | 0.216       | 0.018                        | IM       | Neg    | Neg    | Neg      | 0              | Neg       | IIA              | 61  | C         | Post              | Y            | Neg  | 0         | 1140    | 0          | 1140     |
| TCGA-E7EW-A1PH  | 10-20% | 0.145       | 0.065                        | M        | Neg    | Neg    | Neg      |                | Neg       | IIA              | 52  | C         | Post              | Y            | Pos  | 0         | 607     | 0          | 607      |
| TCGA-B7BH-A0B9  | 30-40% | 0.313       | 0.097                        | IM       | Neg    | Neg    | Neg      | 0              | Neg       | IA               | 44  | C         | Pre               | Y            | Neg  | 0         | 1572    | 0          | 1572     |
| TCGA-A7A2-A3XX  | 1-10%  | 0.018       | 0.054                        | BL1      | Neg    | Neg    | Neg      | 1+             | Neg       | IIA              | 49  | AA        | Post              | Y            | Neg  | 1         | 1439    | 1          | 1439     |
| TCGA-A7AR-A256  |        | 0.018       | 0.000                        | M        | Neg    | Neg    | Neg      | 1+             | Neg       | IIA              | 45  | C         | Pre               | Y            | Neg  | 1         | 2854    | 1          | 1640     |
| TCGA-D8-D8-A1JF | 1-10%  | 0.075       | 0.004                        | LAR      | Neg    | Neg    | Neg      | 1+             | Neg       | IIIA             | 79  | C         | Post              |              | Pos  | 0         | 366     | 0          | 366      |

TCGA: The Cancer Genome Atlas; TNBC: triple negative breast cancer; Cluster assignment: **high in both T cells**, **high in CDS T cells only**, **high in CD4 memory activated T cells only**, **low in both T cells**; TIL: tumor infiltrating lymphocyte; **High quantity of T Cells: > 0.25\*standard deviation**; **Low quantity of T Cells: < 0.25\*standard deviation**; ER: estrogen receptor; IHC: immunohistochemistry; Pos: Positive; Neg: negative; PR: progesterone receptor; HER2: human epidermal growth factor receptor 2; Equiv: equivocal; FISH: fluorescence in situ hybridization; C: Caucasian; AA: African American; LN +: Lymph Node Positive; Y: Yes; OS: overall survival; DFS: disease free survival; BL1: basal-like 1; BL2: basal-like 2; IM: immunomodulatory; M: mesenchymal, MSL: mesenchymal stem-like, LAR: luminal androgen receptor; UNS: unstable; NA: not applicable

**Table S10:** 133 TCGA TNBC Cases

| Bar-code     | % TILs | CD8 T Cells | CD4 Memory Activated T Cells | Sub-type | ER IHC | PR IHC | HER2 IHC | HER2 IHC Level | HER2 FISH | Pathologic Stage | Age | Ethnicity | Menopausal status | Chemotherapy | LN + | OS Status | OS Days | DFS Status | DFS Days |
|--------------|--------|-------------|------------------------------|----------|--------|--------|----------|----------------|-----------|------------------|-----|-----------|-------------------|--------------|------|-----------|---------|------------|----------|
| TCGA-GM-A2DB | 10-20% | 0.094       | 0.000                        | LAR      | Neg    | Neg    | Neg      | 1+             | Neg       | IIA              | 62  | C         | Post              | Y            | Neg  | 0         | 2406    | 0          | 2406     |
| TCGA-BH-A0AV |        | 0.010       | 0.008                        | M        | Neg    | Neg    | Neg      |                | Neg       | I                | 52  | AA        | Y                 | Y            | Neg  | 0         | 1820    | 0          | 1820     |
| TCGA-B6-A402 | 1-10%  | 0.014       | 0.000                        | M        | Neg    | Neg    | Neg      | 1+             | Neg       | I                | 47  | AA        | Y                 | Y            | Neg  | 0         | 2330    | 1          | 1516     |
| TCGA-P2-A14X | 20-30% | 0.180       | 0.033                        | BL1      | Neg    | Neg    | Neg      | 1+             | Neg       | IIIA             | 55  | AA        | Post              | Y            | Pos  | 0         | 972     | 0          | 972      |
| TCGA-A2-A0ST |        | 0.480       | 0.052                        | NA       | Neg    | Neg    | Neg      |                | Neg       | IIA              | 62  | C         | Post              | Y            | Pos  | 0         | 3017    | 1          | 3017     |
| TCGA-BH-A1F6 | <1%    | 0.156       | 0.079                        | BL1      | Neg    | Neg    | Neg      |                | Neg       |                  | 51  | C         |                   |              | Pos  | 1         | 2965    | 1          | 2965     |
| TCGA-P2-A1LH | 1-10%  | 0.299       | 0.035                        | MSL      | Neg    | Neg    | Neg      |                | Neg       | I                | 59  | C         | Post              | Y            | Neg  | 0         | 3247    | 0          | 3247     |
| TCGA-S3-A115 |        | 0.287       | 0.018                        | MSL      | Neg    | Neg    | Neg      |                | Neg       | IIB              | 51  | AA        | Post              | Y            | Pos  | 0         | 525     | 0          | 525      |
| TCGA-A8-A07O | 10-20% | 0.042       | 0.020                        | BL1      | Neg    | Neg    | Neg      | 1+             | Neg       | IIA              | 51  |           | Post              |              | Neg  | 0         | 304     | 0          | 304      |
| TCGA-EW-A1P7 |        | 0.362       | 0.000                        | UNS      | Neg    | Neg    | Equiv    | 2+             | Neg       | IIA              | 59  | C         | Post              | Y            | Neg  | 0         | 915     | 1          | 729      |

TCGA: The Cancer Genome Atlas; TNBC: triple negative breast cancer; Cluster assignment: **high in both T cells**, **high in CD8 T cells only**, **high in CD4 memory activated T cells only**, **low in both T cells**; TIL: tumor infiltrating lymphocyte; **High quantity of T Cells: > 0.25\*standard deviation**; **Low quantity of T Cells: < 0.25\*standard deviation**; ER: estrogen receptor; IHC: immunohistochemistry; Pos: Positive; Neg: negative; PR: progesterone receptor; HER2: human epidermal growth factor receptor 2; Equiv: equivocal; Indet: indeterminate; FISH: fluorescence in situ hybridization; C: Caucasian; AA: African American; LN +: Lymph Node Positive; Y: Yes; OS: overall survival; DFS: disease free survival; BL1: basal-like 1; BL2: basal-like 2; IM: immunomodulatory; M: mesenchymal, MSL: mesenchymal stem-like, LAR: luminal androgen receptor; UNS: unstable; NA: not applicable

**Table S10:** 133 TCGA TNBC Cases

| Bar-code     | % TILs | CD8 T Cells | CD4 Memory Activated T Cells | Sub-type | ER IHC | PR IHC | HER2 IHC | HER2 IHC Level | HER2 FISH | Pathologic Stage | Age | Ethnicity | Menopausal status | Chemotherapy | LN + | OS Status | OS Days | DFS Status | DFS Days |
|--------------|--------|-------------|------------------------------|----------|--------|--------|----------|----------------|-----------|------------------|-----|-----------|-------------------|--------------|------|-----------|---------|------------|----------|
| TCGA-A1-A0SP | 20-30% | 0.044       | 0.004                        | M        | Neg    | Neg    | Neg      | 0              | Neg       | IIA              | 40  | AA        | Post              | Y            | Neg  | 0         | 584     | 0          | 584      |
| TCGA-A2-A3XS | 10-20% | 0.133       | 0.000                        | MSL      | Neg    | Neg    | Neg      |                | Neg       | IIIA             | 62  | AA        | Post              | Y            | Pos  | 1         | 1032    | 1          | 682      |
| TCGA-A8-A08R | 1-10%  | 0.081       | 0.070                        | BL1      | Neg    | Neg    | Neg      | 1+             | Neg       | IIB              | 52  | C         | Post              | Y            | Pos  | 0         | 30      | 0          | 30       |
| TCGA-C8-A27B | 20-30% | 0.131       | 0.077                        | UNS      | Neg    | Neg    | Neg      |                | Neg       | IIB              | 48  | C         | Post              | Y            | Neg  | 0         | 439     | 0          | 439      |
| TCGA-D8-A1XK | 10-20% | 0.050       | 0.068                        | BL1      | Neg    | Neg    | Neg      |                | Neg       | IIB              | 55  | C         | Post              | Y            | Pos  | 0         | 441     | 0          | 441      |
| TCGA-AO-A12F | 10-20% | 0.025       | 0.000                        | UNS      | Neg    | Neg    | Neg      | 1+             | Neg       | IIA              | 36  | C         | Pre               | Y            | Neg  | 0         | 1842    | 0          | 1842     |
| TCGA-AR-A1AQ | 10-20% | 0.265       | 0.177                        | IM       | Neg    | Neg    | Equiv    | 2+             | Neg       | IIA              | 49  | C         | Post              | Y            | Neg  | 0         | 3021    | 0          | 3021     |
| TCGA-C8-A1HJ | 10-20% | 0.080       | 0.053                        | MSL      | Neg    | Neg    | Neg      |                | Neg       | IIA              | 53  | AA        | Post              | Y            | Neg  | 0         | 5       | 0          | 5        |
| TCGA-AC-A61W | 20-30% | 0.159       | 0.062                        | IM       | Neg    | Neg    | Neg      |                | Neg       | IIA              | 73  | AA        | Post              | Y            | Neg  | 0         | 413     | 0          | 413      |
| TCGA-BH-A1EW |        | 0.143       | 0.091                        | NA       | Neg    | Neg    | Neg      |                | Neg       | IIA              | 38  | C         | Pre               | Y            | Pos  | 1         | 1694    | 1          | 1694     |

TCGA: The Cancer Genome Atlas; TNBC: triple negative breast cancer; Cluster assignment: **high in both T cells**, **high in CD8 T cells only**, **high in CD4 memory activated T cells only**, **low in both T cells**; TIL: tumor infiltrating lymphocyte; **High quantity of T Cells: > 0.25\*standard deviation**; **Low quantity of T Cells: < 0.25\*standard deviation**; ER: estrogen receptor; IHC: immunohistochemistry; Pos: Positive; Neg: negative; PR: progesterone receptor; HER2: human epidermal growth factor receptor 2; Equiv: equivocal; Indet: indeterminate; FISH: fluorescence in situ hybridization; C: Caucasian; AA: African American; LN +: Lymph Node Positive; Y: Yes; OS: overall survival; DFS: disease free survival; BL1: basal-like 1; BL2: basal-like 2; IM: immunomodulatory; M: mesenchymal, MSL: mesenchymal stem-like, LAR: luminal androgen receptor; UNS: unstable; NA: not applicable

**Table S10:** 133 TCGA TNBC Cases

| Bar-code     | % TILs | CD8 T Cells | CD4 Memory Activated T Cells | Sub-type | ER IHC | PR IHC | HER2 IHC | HER2 IHC Level | HER2 FISH | Pathologic Stage | Age | Ethnicity | Menopausal status | Chemotherapy | LN + | OS Status | OS Days | DFS Status | DFS Days |
|--------------|--------|-------------|------------------------------|----------|--------|--------|----------|----------------|-----------|------------------|-----|-----------|-------------------|--------------|------|-----------|---------|------------|----------|
| TCGA-E2-A1LL |        | 0.004       | 0.002                        | BL2      | Neg    | Neg    | Neg      | 1+             | HER2 FISH | IIIA             | 73  | AA        | Post              | Y            | Pos  | 0         | 1309    | 1          | 1303     |
| TCGA-E2-A14R | 10-20% | 0.108       | 0.027                        | IM       | Neg    | Neg    | Neg      | 1+             | Neg       | IIA              | 62  | C         | Post              | Y            | Neg  | 0         | 1174    | 0          | 1174     |
| TCGA-A8-A07C | 30-40% | 0.090       | 0.097                        | BL1      | Neg    | Neg    | Neg      | 1+             | Neg       | IIA              | 57  |           | Post              | Y            | Neg  | 0         | 1034    | 0          | 1034     |
| TCGA-EW-A1P1 |        | 0.157       | 0.025                        | MSL      | Neg    | Neg    | Equiv    | 2+             | Neg       | IIIC             | 68  | C         | Post              | Y            | Pos  | 0         | 1210    | 1          | 1014     |
| TCGA-AQ-A04J | <1%    | 0.210       | 0.118                        | MSL      | Neg    | Neg    | Neg      | 0              | Neg       | IIA              | 45  | C         | Pre               | Y            | Neg  | 0         | 819     | 0          | 819      |
| TCGA-AR-A1AR | <1%    | 0.029       | 0.060                        | UNS      | Neg    | Neg    | Neg      |                | Neg       | IIIA             | 50  | C         | Post              | Y            | Pos  | 1         | 524     | 1          | 524      |
| TCGA-AQ-A1KR |        | 0.134       | 0.039                        | LAR      | Neg    | Neg    | Neg      | 1+             | Neg       | IIA              | 51  | C         | Pre               | Y            | Neg  | 0         | 2513    | 0          | 2513     |
| TCGA-GM-A3XL | 20-30% | 0.177       | 0.133                        | IM       | Neg    | Neg    | Neg      |                | Neg       | IIA              | 49  | AA        | Post              | Y            | Neg  | 0         | 2108    | 0          | 2108     |
| TCGA-BH-A0B3 |        | 0.127       | 0.098                        | BL2      | Neg    | Neg    | Neg      | 1+             | Neg       | IIB              | 53  | C         | Post              | Y            | Pos  | 0         | 1203    | 0          | 1203     |
| TCGA-BH-A0E0 | 10-20% | 0.025       | 0.002                        | LAR      | Neg    | Neg    | Neg      | 1+             | Neg       | IIIC             | 38  | C         | Pre               | Y            | Pos  | 0         | 134     | 0          | 134      |

TCGA: The Cancer Genome Atlas; TNBC: triple negative breast cancer; Cluster assignment: **high in both T cells**, **high in CD8 T cells only**, **high in CD4 memory activated T cells only**, **low in both T cells**; TIL: tumor infiltrating lymphocyte; **High quantity of T Cells: > 0.25\*standard deviation**; **Low quantity of T Cells: < 0.25\*standard deviation**; ER: estrogen receptor; IHC: immunohistochemistry; Pos: Positive; Neg: negative; PR: progesterone receptor; HER2: human epidermal growth factor receptor 2; Equiv: equivocal; Indet: indeterminate; FISH: fluorescence in situ hybridization; C: Caucasian; AA: African American; LN +: Lymph Node Positive; Y: Yes; OS: overall survival; DFS: disease free survival; BL1: basal-like 1; BL2: basal-like 2; IM: immunomodulatory; M: mesenchymal, MSL: mesenchymal stem-like, LAR: luminal androgen receptor; UNS: unstable; NA: not applicable

**Table S10:** 133 TCGA TNBC Cases

| Bar-code     | % TILs | CD8 T Cells | CD4 Memory Activated T Cells | Sub-type | ER IHC | PR IHC | HER2 IHC | HER2 IHC Level | HER2 FISH | Pathologic Stage | Age | Ethnicity | Menopausal status | Chemotherapy | LN + | OS Status | OS Days | DFS Status | DFS Days |
|--------------|--------|-------------|------------------------------|----------|--------|--------|----------|----------------|-----------|------------------|-----|-----------|-------------------|--------------|------|-----------|---------|------------|----------|
| TCGA-A2-0001 | >70%   | 0.189       | 0.000                        | IM       | Neg    | Neg    | Equiv    | 2+             | Neg       | IA               | 48  | AA        | Y                 | Y            | Neg  | 0         | 1062    | 0          | 1062     |
| TCGA-A2-0002 | 10-20% | 0.197       | 0.120                        | LAR      | Neg    | Neg    | Equiv    | 2+             | Neg       | I                | 53  | C         | Post              | Y            | Neg  | 0         | 2282    | 0          | 2282     |
| TCGA-A2-0003 | 1-10%  | 0.050       | 0.000                        | M        | Neg    | Neg    | Equiv    | 2+             | Neg       | IIA              | 57  | C         | Y                 | Y            | Neg  | 0         | 1074    | 0          | 1074     |
| TCGA-A2-0004 | 1-10%  | 0.017       | 0.000                        | M        | Neg    | Neg    | Neg      | 0              | Neg       | IIB              | 48  | C         | Post              | Y            | Pos  | 0         | 554     | 0          | 554      |
| TCGA-A2-0005 | 50-60% | 0.537       | 0.073                        | UNS      | Neg    | Neg    | Neg      | 0              | Neg       | IIB              | 56  | C         | Post              | Y            | Pos  | 0         | 789     | 0          | 789      |
| TCGA-A2-0006 |        | 0.081       | 0.014                        | M        | Neg    | Neg    | Equiv    | 2+             | Neg       | IIB              | 74  | C         | Post              | Y            | Neg  | 0         | 425     | 0          | 425      |
| TCGA-A2-0007 | 20-30% | 0.033       | 0.014                        | M        | Neg    | Neg    | Neg      | 0              | Neg       | IIB              | 49  | AA        | Post              | Y            | Pos  | 1         | 1093    | 1          | 802      |
| TCGA-A2-0008 | 1-10%  | 0.067       | 0.000                        | MSL      | Neg    | Neg    | Neg      | 1+             | Neg       | IIA              | 53  | AA        | Post              | Y            | Pos  | 0         | 2155    | 0          | 2155     |
| TCGA-A2-0009 | 30-40% | 0.220       | 0.083                        | BL2      | Neg    | Neg    | Neg      | 1+             | Neg       | IA               | 48  | C         | Pre               | Y            | Neg  | 0         | 1534    | 1          | 1239     |
| TCGA-A2-0010 | <1%    | 0.000       | 0.000                        | MSL      | Neg    | Neg    | Equiv    | 2+             | Neg       | IIA              | 65  | C         | Post              | Y            | Neg  | 0         | 661     | 0          | 661      |

TCGA: The Cancer Genome Atlas; TNBC: triple negative breast cancer; Cluster assignment: **high in both T cells**, **high in CD8 T cells only**, **high in CD4 memory activated T cells only**, **low in both T cells**; TIL: tumor infiltrating lymphocyte; **High quantity of T Cells: > 0.25\*standard deviation**; **Low quantity of T Cells: < 0.25\*standard deviation**; ER: estrogen receptor; IHC: immunohistochemistry; Pos: Positive; Neg: negative; PR: progesterone receptor; HER2: human epidermal growth factor receptor 2; Equiv: equivocal; Indet: indeterminate; FISH: fluorescence in situ hybridization; C: Caucasian; AA: African American; LN +: Lymph Node Positive; Y: Yes; OS: overall survival; DFS: disease free survival; BL1: basal-like 1; BL2: basal-like 2; IM: immunomodulatory; M: mesenchymal, MSL: mesenchymal stem-like, LAR: luminal androgen receptor; UNS: unstable; NA: not applicable



**Table S10:** 133 TCGA TNBC Cases

| Bar-code       | % TILs | CD8 T Cells | CD4 Memory Activated T Cells | Sub-type | ER IHC | PR IHC | HER2 IHC | HER2 IHC Level | HER2 FISH | Pathologic Stage | Age | Ethnicity | Menopausal status | Chemotherapy | LN + | OS Status | OS Days | DFS Status | DFS Days |
|----------------|--------|-------------|------------------------------|----------|--------|--------|----------|----------------|-----------|------------------|-----|-----------|-------------------|--------------|------|-----------|---------|------------|----------|
| TCGA-A1AN-A0AL | 20-30% | 0.037       | 0.032                        | MSL      | Neg    | Neg    | Neg      | 0              | Neg       | IIIB             | 41  | C         | Pre               |              | Neg  | 0         | 227     | 0          | 227      |
| TCGA-E2-A1B6   |        | 0.421       | 0.271                        | IM       | Neg    | Neg    | Equiv    | 2+             | Neg       | IIA              | 44  | C         | Pre               | Y            | Neg  | 0         | 867     | 0          | 867      |
| TCGA-OL-A66P   | 20-30% | 0.506       | 0.065                        | LAR      | Neg    | Neg    | Neg      |                | Neg       | IIA              | 75  | AA        | Y                 | Y            | Neg  | 0         | 428     | 0          | 428      |
| TCGA-EW-A1P8   | 10-20% | 0.075       | 0.012                        | BL2      | Neg    | Neg    | Neg      |                | Neg       | IIIC             | 58  | C         | Post              | Y            | Pos  | 1         | 239     | 1          | 207      |
| TCGA-EW-A3U0   | <1%    | 0.417       | 0.164                        | UNS      | Neg    | Neg    | Neg      |                | Neg       | IIIA             | 61  | AA        | Post              | Y            | Pos  | 0         | 532     | 0          | 532      |
| TCGA-AO-A129   | 10-20% | 0.193       | 0.047                        | IM       | Neg    | Neg    | Neg      | 0              | Neg       | IIB              | 29  | C         | Pre               | Y            | Pos  | 0         | 3286    | 0          | 3286     |
| TCGA-A2-A04P   | 1-10%  | 0.076       | 0.000                        | NA       | Neg    | Neg    | Neg      |                | Neg       | IIIC             | 36  | AA        | Pre               | Y            | Pos  | 1         | 548     | 1          | 102      |
| TCGA-A2-A0CM   | 40-50% | 0.212       | 0.100                        | IM       | Neg    | Neg    | Neg      | 0              | Neg       | IIA              | 40  | AA        | Pre               | Y            | Neg  | 1         | 754     | 1          | 382      |
| TCGA-A2-A0YM   | 10-20% | 0.034       | 0.009                        | BL1      | Neg    | Neg    | Neg      |                | Neg       | IIA              | 67  | C         | Post              |              | Neg  | 0         | 965     | 0          | 965      |
| TCGA-D8-A147   | 10-20% | 0.045       | 0.000                        | BL1      | Neg    | Neg    | Neg      |                | Neg       | IIB              | 45  | C         | Post              | Y            | Neg  | 0         | 584     | 0          | 584      |

TCGA: The Cancer Genome Atlas; TNBC: triple negative breast cancer; Cluster assignment: **high in both T cells**, **high in CDS T cells only**, **high in CD4 memory activated T cells only**, **low in both T cells**; TIL: tumor infiltrating lymphocyte; **High quantity of T Cells: > 0.25\*standard deviation**; **Low quantity of T Cells: < 0.25\*standard deviation**; ER: estrogen receptor; IHC: immunohistochemistry; Pos: Positive; Neg: negative; PR: progesterone receptor; HER2: human epidermal growth factor receptor 2; Equiv: equivocal; FISH: fluorescence in situ hybridization; C: Caucasian; AA: African American; LN +: Lymph Node Positive; Y: Yes; OS: overall survival; DFS: disease free survival; BL1: basal-like 1; BL2: basal-like 2; IM: immunomodulatory; M: mesenchymal, MSL: mesenchymal stem-like, LAR: luminal androgen receptor; UNS: unstable; NA: not applicable

**Table S10:** 133 TCGA TNBC Cases

| Bar-code     | % TILs | CD8 T Cells | CD4 Memory Activated T Cells | Sub-type | ER IHC | PR IHC | HER2 IHC | HER2 IHC Level | HER2 FISH | Pathologic Stage | Age | Ethnicity | Menopausal status | Chemotherapy | LN + | OS Status | OS Days | DFS Status | DFS Days |
|--------------|--------|-------------|------------------------------|----------|--------|--------|----------|----------------|-----------|------------------|-----|-----------|-------------------|--------------|------|-----------|---------|------------|----------|
| TCGA-E2-A158 | 20-30% | 0.038       | 0.000                        | M        | Neg    | Neg    | Neg      | 1+             | HER2 FISH | IIA              | 43  | C         | Pre               | Y            | Pos  | 0         | 450     | 0          | 450      |
| TCGA-E2-A150 | <1%    | 0.006       | 0.007                        | BL2      | Neg    | Neg    | Neg      |                |           | IIA              | 48  | C         | Post              | Y            | Neg  | 0         | 1935    | 0          | 1935     |
| TCGA-AC-A2BK | 1-10%  | 0.085       | 0.004                        | M        | Neg    | Neg    | Neg      |                |           | IIIA             | 78  | AA        | Post              | Y            | Pos  | 0         | 2222    | 0          | 2222     |
| TCGA-D8-A1JG |        | 0.098       | 0.083                        | LAR      | Neg    | Neg    | Equiv    | 2+             | Neg       | IIA              | 62  | C         | Post              | Y            | Neg  | 0         | 1612    | 0          | 1612     |
| TCGA-AN-A0G0 | 10-20% | 0.018       | 0.020                        | UNS      | Neg    | Neg    | Neg      | 1+             |           | IIA              | 56  | C         | Post              |              | Neg  | 0         | 16      | 0          | 16       |
| TCGA-S3-AA10 | 40-50% | 0.273       | 0.085                        | IM       | Neg    | Neg    | Neg      | 1+             |           | IIA              | 65  | AA        | Post              | Y            | Neg  | 0         | 586     | 0          | 586      |
| TCGA-C8-A131 | 20-30% | 0.067       | 0.019                        | LAR      | Neg    | Neg    | Neg      | 1+             |           | IIIA             | 82  |           | Post              | Y            | Pos  | 0         | 411     | 0          | 411      |
| TCGA-E2-A1L5 | 1-10%  | 0.026       | 0.000                        | UNS      | Neg    | Neg    | Neg      | 1+             |           | IA               | 46  | C         | Pre               | Y            | Neg  | 0         | 1604    | 0          | 1604     |
| TCGA-A2-A0T0 | 1-10%  | 0.029       | 0.002                        | M        | Neg    | Neg    | Neg      | 0              |           | IIB              | 59  | C         | Post              | Y            | Pos  | 0         | 533     | 0          | 533      |
| TCGA-GM-A2D1 |        | 0.590       | 0.224                        | NA       | Neg    | Neg    | Neg      |                | Neg       | I                | 52  | C         | Pre               | Y            | Neg  | 0         | 2590    | 0          | 2590     |

TCGA: The Cancer Genome Atlas; TNBC: triple negative breast cancer; Cluster assignment: **high in both T cells**, **high in CD8 T cells only**, **high in CD4 memory activated T cells only**, **low in both T cells**; TIL: tumor infiltrating lymphocyte; **High quantity of T Cells: > 0.25\*standard deviation**; **Low quantity of T Cells: < 0.25\*standard deviation**; ER: estrogen receptor; IHC: immunohistochemistry; Pos: Positive; Neg: negative; PR: progesterone receptor; HER2: human epidermal growth factor receptor 2; Equiv: equivocal; Indet: indeterminate; FISH: fluorescence in situ hybridization; C: Caucasian; AA: African American; LN +: Lymph Node Positive; Y: Yes; OS: overall survival; DFS: disease free survival; BL1: basal-like 1; BL2: basal-like 2; IM: immunomodulatory; M: mesenchymal, MSL: mesenchymal stem-like, LAR: luminal androgen receptor; UNS: unstable; NA: not applicable

**Table S10:** 133 TCGA TNBC Cases

| Bar-code     | % TILs | CD8 T Cells | CD4 Memory Activated T Cells | Sub-type | ER IHC | PR IHC | HER2 IHC | HER2 IHC Level | HER2 FISH | Pathologic Stage | Age | Ethnicity | Menopausal status | Chemotherapy | LN + | OS Status | OS Days | DFS Status | DFS Days |
|--------------|--------|-------------|------------------------------|----------|--------|--------|----------|----------------|-----------|------------------|-----|-----------|-------------------|--------------|------|-----------|---------|------------|----------|
| TCGA-A7-A6VY |        | 0.065       | 0.106                        | BL2      | Neg    | Neg    | Neg      |                |           | IIB              | 48  | AA        | Post              | Y            | Pos  | 0         | 266     | 0          | 266      |
| TCGA-BH-A0BL | 30-40% | 0.052       | 0.074                        | UNS      | Neg    | Neg    | Neg      |                |           | I                | 35  | C         | Pre               | Y            | Neg  | 0         | 2278    | 0          | 2278     |
| TCGA-A2-A04T | 20-30% | 0.191       | 0.093                        | BL1      | Neg    | Neg    | Equiv    | 2+             | Neg       | IIA              | 62  | C         | Post              | Y            | Neg  | 0         | 2246    | 0          | 2246     |
| TCGA-C8-A26X | 20-30% | 0.183       | 0.093                        | LAR      | Neg    | Neg    | Neg      | 1+             |           | IIA              | 58  | C         | Post              | Y            | Pos  | 0         | 376     | 0          | 376      |
| TCGA-AR-A0TS | <1%    | 0.247       | 0.117                        | BL1      | Neg    | Neg    | Neg      | 1+             |           | IIB              | 46  | C         | Pre               | Y            | Pos  | 0         | 2558    | 0          | 2558     |
| TCGA-BH-A0BW |        | 0.084       | 0.071                        | UNS      | Neg    | Neg    | Neg      |                | Neg       | I                | 71  | AA        | Post              | Y            | Neg  | 0         | 2371    | 0          | 2371     |
| TCGA-B6-A400 | 10-20% | 0.032       | 0.003                        | M        | Neg    | Neg    | Neg      | 1+             |           | IIIA             | 43  | AA        |                   |              | Pos  | 0         | 215     | 0          | 215      |
| TCGA-EW-A1PB | 1-10%  | 0.220       | 0.069                        | IM       | Neg    | Neg    | Neg      |                |           | IIIA             | 70  | AA        | Post              |              | Pos  | 0         | 608     | 0          | 608      |
| TCGA-GM-A2DH | 20-30% | 0.251       | 0.079                        | UNS      | Neg    | Neg    | Neg      | 1+             | Neg       | I                | 58  | C         | Post              | Y            | Neg  | 0         | 2193    | 0          | 2193     |
| TCGA-E2-A1AZ | <1%    | 0.136       | 0.124                        | MSL      | Neg    | Neg    | Indet    |                | Neg       | IIB              | 63  | C         | Post              | Y            | Pos  | 0         | 2329    | 0          | 2329     |

TCGA: The Cancer Genome Atlas; TNBC: triple negative breast cancer; Cluster assignment: **high in both T cells**, **high in CDS T cells only**, **high in CD4 memory activated T cells only**, **low in both T cells**; TIL: tumor infiltrating lymphocyte; **High quantity of T Cells: > 0.25\*standard deviation**; **Low quantity of T Cells: < 0.25\*standard deviation**; ER: estrogen receptor; IHC: immunohistochemistry; Pos: Positive; Neg: negative; PR: progesterone receptor; HER2: human epidermal growth factor receptor 2; Equiv: equivocal; Indet: indeterminate; FISH: fluorescence in situ hybridization; C: Caucasian; AA: African American; LN +: Lymph Node Positive; Y: Yes; OS: overall survival; DFS: disease free survival; BL1: basal-like 1; BL2: basal-like 2; IM: immunomodulatory; M: mesenchymal, MSL: mesenchymal stem-like, LAR: luminal androgen receptor; UNS: unstable; NA: not applicable

**Table S10:** 133 TCGA TNBC Cases

| Bar-code            | % TILs | CD8 T Cells  | CD4 Memory Activated T Cells | Sub-type | ER IHC | PR IHC | HER2 IHC | HER2 IHC Level | HER2 FISH | Pathologic Stage | Age | Ethnicity | Menopausal status | Chemotherapy | LN + | OS Status | OS Days | DFS Status | DFS Days |
|---------------------|--------|--------------|------------------------------|----------|--------|--------|----------|----------------|-----------|------------------|-----|-----------|-------------------|--------------|------|-----------|---------|------------|----------|
| <b>TCGA-OL-A5D6</b> | <1%    | <b>0.039</b> | <b>0.000</b>                 | LAR      | Neg    | Neg    | Neg      | Neg            | Neg       | IIA              | 71  | AA        | Post              |              | Neg  | 1         | 1104    | 1          | 1104     |
| <b>TCGA-A2-A0D0</b> | 10-20% | 0.124        | 0.038                        | UNS      | Neg    | Neg    | Neg      | 0              | Neg       | IIA              | 60  | AA        | Post              | Y            | Neg  | 0         | 2048    | 0          | 2048     |
| <b>TCGA-BH-A18V</b> | 10-20% | <b>0.006</b> | <b>0.001</b>                 | BL1      | Neg    | Neg    | Neg      | Neg            | Neg       | IIB              | 48  | C         | Post              |              | Pos  | 1         | 1556    | 1          | 1556     |
| <b>TCGA-A7-A4SD</b> |        | 0.154        | <b>0.019</b>                 | BL2      | Neg    | Neg    | Equiv    | 2+             | Neg       | IIA              | 52  | AA        | Post              | Y            | Neg  | 0         | 441     | 0          | 441      |

TCGA: The Cancer Genome Atlas; TNBC: triple negative breast cancer; Cluster assignment: **high in both T cells**, **high in CD8 T cells only**, **high in CD4 memory activated T cells only**, **low in both T cells**; TIL: tumor infiltrating lymphocyte; **High quantity of T Cells: > 0.25\*standard deviation**; **Low quantity of T Cells: < 0.25\*standard deviation**; ER: estrogen receptor; IHC: immunohistochemistry; Pos: Positive; Neg: negative; PR: progesterone receptor; HER2: human epidermal growth factor receptor 2; Equiv: equivocal; Indet: indeterminate; FISH: fluorescence in situ hybridization; C: Caucasian; AA: African American; LN +: Lymph Node Positive; Y: Yes; OS: overall survival; DFS: disease free survival; BL1: basal-like 1; BL2: basal-like 2; IM: immunomodulatory; M: mesenchymal, MSL: mesenchymal stem-like, LAR: luminal androgen receptor; UNS: unstable; NA: not applicable

**Table S11:** 199 METABRIC TNBC Cases

| Patient ID | CD8 T Cells | T Cells gamma delta | Sub-type | ER IHC | ER Status | PR Status | HER2 Status | HER2 SNP6 | Tumor Stage | Age At Diagnosis | Inferred Menopause | Chemotherapy | LN+ | OS Status | OS Months |
|------------|-------------|---------------------|----------|--------|-----------|-----------|-------------|-----------|-------------|------------------|--------------------|--------------|-----|-----------|-----------|
| MB-0062    | 0.000       | 0.131               | BL1      | Neg    | Neg       | Neg       | Neg         | Neutral   | 1           | 52.14            | Post               | Y            | Neg | 0         | 153.97    |
| MB-0079    | 0.066       | 0.027               | LAR      | Neg    | Neg       | Neg       | Neg         | Neutral   | 2           | 50.42            | Post               | Y            | Pos | 1         | 28.5      |
| MB-0100    | 0.024       | 0.109               | UNS      | Neg    | Neg       | Neg       | Neg         | Neutral   | 2           | 68.68            | Post               | Y            | Neg | 1         | 8.07      |
| MB-0115    | 0.000       | 0.125               | UNS      | Neg    | Neg       | Neg       | Neg         | Neutral   | 2           | 39.84            | Pre                | Y            | Neg | 1         | 66.73     |
| MB-0149    | 0.000       | 0.000               | M        | Neg    | Neg       | Neg       | Neg         | Loss      | 2           | 77.13            | Post               | N            | Neg | 1         | 51.7      |
| MB-0157    | 0.243       | 0.03                | UNS      | Neg    | Neg       | Neg       | Neg         | Neutral   | 2           | 71.5             | Post               | N            | Neg | 0         | 114.77    |
| MB-0158    |             |                     |          | Neg    | Neg       | Neg       | Neg         | Neutral   | 2           | 50.43            | Post               | Y            |     | 0         | 192.3     |
| MB-0163    | 0.028       | 0.021               | M        | Neg    | Neg       | Neg       | Neg         | Neutral   | NA          | 84.73            | Post               | N            | Pos | 1         | 98.1      |
| MB-0164    | 0.004       | 0.033               | BL2      | Neg    | Neg       | Neg       | Neg         | Neutral   | 2           | 37.87            | Pre                | Y            | Neg | 0         | 10.83     |
| MB-0174    | 0.000       | 0.001               | UNS      | Neg    | Neg       | Neg       | Neg         | Neutral   | 2           | 59.18            | Post               | Y            | Neg | 0         | 78.77     |
| MB-0191    | 0.000       | 0.102               | UNS      | Neg    | Neg       | Neg       | Neg         | Neutral   | 2           | 81.02            | Post               | N            | Neg | 1         | 15.3      |
| MB-0238    | 0.053       | 0.110               | IM       | Neg    | Neg       | Neg       | Neg         | Neutral   | 2           | 52.19            | Post               | Y            | Pos | 0         | 193.17    |
| MB-0269    | 0.037       | 0.000               | UNS      | Neg    | Neg       | Neg       | Neg         | Neutral   | 2           | 45.39            | Pre                | Y            | Pos | 0         | 22.23     |
| MB-0292    | 0.021       | 0.011               | LAR      | Neg    | Neg       | Neg       | Neg         | Neutral   | 2           | 80.34            | Post               | N            | Pos | 1         | 49.43     |
| MB-0303    | 0.124       | 0.083               | IM       | Neg    | Neg       | Neg       | Neg         | Neutral   | 1           | 47.71            | Pre                | N            | Neg | 0         | 60.13     |
| MB-0316    | 0.140       | 0.079               | IM       | Neg    | Neg       | Neg       | Neg         | Neutral   | 2           | 50.82            | Post               | N            | Neg | 0         | 182.9     |
| MB-0350    | 0.053       | 0.010               | M        | Neg    | Neg       | Neg       | Neg         | Neutral   | 2           | 49.05            | Pre                | N            | Neg | 1         | 46.07     |
| MB-0354    | 0.177       | 0.299               | IM       | Neg    | Neg       | Neg       | Neg         | Neutral   | 2           | 73.01            | Post               | N            | Pos | 1         | 11.6      |
| MB-0372    | 0.177       | 0.057               | IM       | Neg    | Neg       | Neg       | Neg         | Neutral   | 1           | 39.86            | Pre                | Y            | Neg | 1         | 62.77     |
| MB-0396    | 0.355       | 0.035               | UNS      | Neg    | Neg       | Neg       | Neg         | Neutral   | 2           | 56.45            | Post               | Y            | Neg | 0         | 60.67     |
| MB-0399    | 0.035       | 0.086               | LAR      | Neg    | Neg       | Neg       | Neg         | Neutral   | 3           | 68.47            | Post               | Y            | Pos | 1         | 137.1     |
| MB-0400    | 0.009       | 0.072               | M        | Neg    | Neg       | Neg       | Neg         | Neutral   | 1           | 55.28            | Post               | Y            | Neg | 1         | 22.47     |
| MB-0401    | 0.043       | 0.018               | M        | Neg    | Neg       | Neg       | Neg         | Neutral   | 1           | 48.58            | Pre                | Y            | Neg | 1         | 26.27     |
| MB-0414    | 0.233       | 0.040               | IM       | Neg    | Neg       | Neg       | Neg         | Loss      | 2           | 72.16            | Post               | N            | Neg | 0         | 76.63     |

METABRIC: Molecular Taxonomy of Breast Cancer International Consortium; TNBC: triple negative breast cancer; **High quantity of T Cells: > 0.25\*standard deviation**; **Low quantity of T Cells: < 0.25\*standard deviation**; ER: estrogen receptor; IHC: immunohistochemistry; Pos: Positive; Neg: negative; PR: progesterone receptor; HER2: human epidermal growth factor receptor 2; LN +: Lymph Node Positive; Y: Yes; N: No; OS: overall survival; DFS: disease free survival; BL1: basal-like 1; BL2: basal-like 2; IM: immunomodulatory; M: mesenchymal, MSL: mesenchymal stem-like, LAR: luminal androgen receptor; UNS: unstable; NA: not applicable

**Table S11:** 199 METABRIC TNBC Cases

| Patient ID | CD8 T Cells | T Cells gamma delta | Sub-type | ER IHC | ER Status | PR Status | HER2 Status | HER2 SNP6 | Tumor Stage | Age At Diagnosis | Inferred Menopause | Chemotherapy | LN+ | OS Status | OS Months |
|------------|-------------|---------------------|----------|--------|-----------|-----------|-------------|-----------|-------------|------------------|--------------------|--------------|-----|-----------|-----------|
| MB-0420    | 0.007       | 0.017               | M        | Neg    | Neg       | Neg       | Neg         | Neutral   | 1           | 34.92            | Pre                | Y            | Neg | 0         | 76.73     |
| MB-0436    | 0.000       | 0.042               | BL2      | Neg    | Neg       | Neg       | Neg         | Neutral   | 1           | 88.29            | Post               | N            | Neg | 1         | 75.5      |
| MB-0446    | 0.005       | 0.021               | BL2      | Neg    | Neg       | Neg       | Neg         | Neutral   | 2           | 56.96            | Post               | Y            | Neg | 0         | 72.27     |
| MB-0464    | 0.055       | 0.149               | LAR      | Neg    | Neg       | Neg       | Neg         | Loss      | 3           | 58.98            | Post               | Y            | Pos | 1         | 39.3      |
| MB-0481    | 0.158       | 0.103               | M        | Neg    | Neg       | Neg       | Neg         | Neutral   | 1           | 54.22            | Post               | Y            | Neg | 1         | 36.4      |
| MB-0494    | 0.094       | 0.000               | BL2      | Neg    | Neg       | Neg       | Neg         | Neutral   | 3           | 77.22            | Post               | Y            | Pos | 1         | 36.63     |
| MB-0516    | 0.031       | 0.000               | M        | Neg    | Neg       | Neg       | Neg         | Neutral   | 1           | 62.81            | Post               | Y            | Neg | 0         | 114.47    |
| MB-0525    | 0.000       | 0.000               | BL2      | Neg    | Neg       | Neg       | Neg         | Neutral   | 2           | 48.47            | Pre                | Y            | Neg | 0         | 65.87     |
| MB-0581    | 0.028       | 0.000               | BL2      | Neg    | Neg       | Neg       | Neg         | Neutral   | 2           | 96.29            | Post               | N            | Pos | 1         | 7.87      |
| MB-0588    | 0.041       | 0.024               | LAR      | Neg    | Neg       | Neg       | Neg         | Neutral   | 2           | 76.35            | Post               | N            | Neg | 0         | 119.73    |
| MB-0627    | 0.081       | 0.147               | MSL      | Neg    | Neg       | Neg       | Neg         | Neutral   | NA          | 54.1             | Post               | N            | Neg | 0         | 0.77      |
| MB-0639    | 0.119       | 0.032               | M        | Neg    | Neg       | Neg       | Neg         | Neutral   | 1           | 50.39            | Post               | Y            | Neg | 0         | 75.4      |
| MB-0658    | 0.174       | 0.139               | BL2      | Neg    | Neg       | Neg       | Neg         | Loss      | 2           | 60.89            | Post               | Y            | Pos | 0         | 97.27     |
| MB-0664    | 0.042       | 0.004               | BL1      | Neg    | Neg       | Neg       | Neg         | Neutral   | 3           | 78.27            | Post               | Y            | Pos | 1         | 11.07     |
| MB-0869    | 0.058       | 0.083               | BL1      | Neg    | Neg       | Neg       | Neg         | Neutral   | 2           | 58.83            | Post               | Y            | Neg | 1         | 112.4     |
| MB-0874    | 0.107       | 0.061               | BL1      | Neg    | Neg       | Neg       | Neg         | Neutral   | 2           | 59.22            | Post               | Y            | Neg | 1         | 16.6      |
| MB-0901    | 0.078       | 0.212               | BL1      | Neg    | Neg       | Neg       | Neg         | Neutral   | 2           | 68.19            | Post               | Y            | Pos | 0         | 136.17    |
| MB-2724    | 0.123       | 0.155               | IM       | Neg    | Neg       | Neg       | Neg         | Neutral   | 1           | 60.59            | Post               | N            | Neg | 1         | 108.07    |
| MB-2827    | 0.103       | 0.079               | UNS      | Neg    | Neg       | Neg       | Neg         | Neutral   | 2           | 36.5             | Pre                | Y            | Pos | 0         | 235.67    |
| MB-2842    | 0.011       | 0.000               | IM       | Neg    | Neg       | Neg       | Neg         | Neutral   | 2           | 58.48            | Post               | Y            | Pos | 1         | 19.73     |
| MB-2849    | 0.116       | 0.100               | IM       | Neg    | Neg       | Neg       | Neg         | Neutral   | 1           | 60.65            | Post               | N            | Neg | 1         | 43.2      |
| MB-2850    | 0.137       | 0.111               | IM       | Neg    | Neg       | Neg       | Neg         | Neutral   | 3           | 31.48            | Pre                | Y            | Pos | 1         | 9.43      |
| MB-2857    | 0.000       | 0.183               | IM       | Neg    | Neg       | Neg       | Neg         | Neutral   | 2           | 45.3             | Pre                | Y            | Pos | 0         | 250.67    |
| MB-2904    | 0.221       | 0.000               | IM       | Neg    | Neg       | Neg       | Neg         | Neutral   | 2           | 34.83            | Pre                | Y            | Pos | 1         | 125.6     |

METABRIC: Molecular Taxonomy of Breast Cancer International Consortium; TNBC: triple negative breast cancer; **High quantity of T Cells: > 0.25\*standard deviation**; **Low quantity of T Cells: < 0.25\*standard deviation**; ER: estrogen receptor; IHC: immunohistochemistry; Pos: Positive; Neg: negative; PR: progesterone receptor; HER2: human epidermal growth factor receptor 2; LN +: Lymph Node Positive; Y: Yes; N: No; OS: overall survival; DFS: disease free survival; BL1: basal-like 1; BL2: basal-like 2; IM: immunomodulatory; M: mesenchymal, MSL: mesenchymal stem-like, LAR: luminal androgen receptor; UNS: unstable; NA: not applicable

**Table S11:** 199 METABRIC TNBC Cases

| Patient ID | CD8 T Cells | T Cells gamma delta | Sub-type | ER IHC | ER Status | PR Status | HER2 Status | HER2 SNP6 | Tumor Stage | Age At Diagnosis | Inferred Menopause | Chemotherapy | LN+ | OS Status | OS Months |
|------------|-------------|---------------------|----------|--------|-----------|-----------|-------------|-----------|-------------|------------------|--------------------|--------------|-----|-----------|-----------|
| MB-2912    | 0.223       | 0.114               | BL1      | Neg    | Neg       | Neg       | Neg         | Neutral   | 3           | 59.6             | Post               | Y            | Pos | 0         | 267.4     |
| MB-2917    | 0.002       | 0.124               | UNS      | Neg    | Neg       | Neg       | Neg         | Neutral   | 2           | 33.9             | Pre                | Y            | Pos | 1         | 31.93     |
| MB-2929    | 0.003       | 0.096               | LAR      | Neg    | Neg       | Neg       | Neg         | Neutral   | 2           | 53.31            | Post               | Y            | Pos | 1         | 262.87    |
| MB-2957    | 0.027       | 0.079               | UNS      | Neg    | Neg       | Neg       | Neg         | Neutral   | 2           | 31.02            | Pre                | Y            | Pos | 0         | 262.13    |
| MB-2993    | 0.090       | 0.048               | NA       | Neg    | Neg       | Neg       | Neg         | Neutral   | 1           | 63.65            | Post               | N            | Neg | 0         | 187.03    |
| MB-3001    | 0.064       | 0.029               | BL1      | Neg    | Neg       | Neg       | Neg         | Loss      | 2           | 50.45            | Post               | Y            | Pos | 0         | 263.23    |
| MB-3014    | 0.079       | 0.076               | BL1      | Neg    | Neg       | Neg       | Neg         | Neutral   | 2           | 39.7             | Pre                | Y            | Pos | 0         | 262.63    |
| MB-3046    | 0.058       | 0.036               | M        | Neg    | Neg       | Neg       | Neg         | Neutral   | 1           | 67.2             | Post               | N            | Neg | 1         | 73.83     |
| MB-3057    | 0.049       | 0.000               | BL1      | Neg    | Neg       | Neg       | Neg         | Neutral   | 2           | 55.3             | Post               | Y            | Pos | 1         | 32.03     |
| MB-3058    | 0.000       | 0.078               | UNS      | Neg    | Neg       | Neg       | Neg         | Neutral   | 2           | 47.74            | Pre                | Y            | Pos | 0         | 254.27    |
| MB-3062    | 0.136       | 0.076               | MSL      | Neg    | Neg       | Neg       | Neg         | Neutral   | 1           | 62.87            | Post               | N            | Neg | 0         | 146.37    |
| MB-3063    | 0.000       | 0.059               | M        | Neg    | Neg       | Neg       | Neg         | Neutral   | 3           | 43.51            | Pre                | Y            | Pos | 1         | 28.57     |
| MB-3153    | 0.000       | 0.083               | LAR      | Neg    | Neg       | Neg       | Neg         | Neutral   | 2           | 42.17            | Pre                | Y            | Pos | 0         | 227.93    |
| MB-3211    | 0.090       | 0.053               | IM       | Neg    | Neg       | Neg       | Neg         | Neutral   | 1           | 58.31            | Post               | N            | Neg | 0         | 145.5     |
| MB-3218    | 0.001       | 0.211               | BL1      | Neg    | Neg       | Neg       | Neg         | Neutral   | 2           | 44.94            | Pre                | Y            | Pos | 0         | 248.77    |
| MB-3271    | 0.000       | 0.000               | IM       | Neg    | Neg       | Neg       | Neg         | Neutral   | 1           | 59.43            | Post               | N            | Neg | 1         | 65.47     |
| MB-3277    | 0.083       | 0.000               | IM       | Neg    | Neg       | Neg       | Neg         | Neutral   | 2           | 29.92            | Pre                | Y            | Pos | 1         | 32.93     |
| MB-3292    | 0.076       | 0.036               | IM       | Neg    | Neg       | Neg       | Neg         | Neutral   | 1           | 60.04            | Post               | N            | Neg | 0         | 217.77    |
| MB-3297    | 0.012       | 0.037               | NA       | Neg    | Neg       | Neg       | Neg         | Neutral   | 2           | 42.72            | Pre                | Y            | Pos | 0         | 236.07    |
| MB-3383    | 0.000       | 0.054               | UNS      | Neg    | Neg       | Neg       | Neg         | Neutral   | 3           | 38.49            | Pre                | Y            | Pos | 1         | 23.2      |
| MB-3395    | 0.105       | 0.122               | MSL      | Neg    | Neg       | Neg       | Neg         | Neutral   | 1           | 52.45            | Post               | N            | Neg | 0         | 243.77    |
| MB-3396    | 0.000       | 0.103               | BL2      | Neg    | Neg       | Neg       | Neg         | Neutral   | 2           | 59.29            | Post               | Y            | Pos | 0         | 226.73    |
| MB-3453    | 0.064       | 0.038               | UNS      | Neg    | Neg       | Neg       | Neg         | Neutral   | 2           | 51.36            | Post               | Y            | Pos | 1         | 32.83     |
| MB-3500    | 0.000       | 0.046               | UNS      | Neg    | Neg       | Neg       | Neg         | Neutral   | 1           | 66.91            | Post               | N            | Neg | 0         | 239.3     |

METABRIC: Molecular Taxonomy of Breast Cancer International Consortium; TNBC: triple negative breast cancer; **High quantity of T Cells: > 0.25\*standard deviation**; **Low quantity of T Cells: < 0.25\*standard deviation**; ER: estrogen receptor; IHC: immunohistochemistry; Pos: Positive; Neg: negative; PR: progesterone receptor; HER2: human epidermal growth factor receptor 2; LN +: Lymph Node Positive; Y: Yes; N: No; OS: overall survival; DFS: disease free survival; BL1: basal-like 1; BL2: basal-like 2; IM: immunomodulatory; M: mesenchymal, MSL: mesenchymal stem-like, LAR: luminal androgen receptor; UNS: unstable; NA: not applicable

**Table S11:** 199 METABRIC TNBC Cases

| Patient ID | CD8 T Cells | T Cells gamma delta | Sub-type | ER IHC | ER Status | PR Status | HER2 Status | HER2 SNP6 | Tumor Stage | Age At Diagnosis | Inferred Menopause | Chemotherapy | LN+ | OS Status | OS Months |
|------------|-------------|---------------------|----------|--------|-----------|-----------|-------------|-----------|-------------|------------------|--------------------|--------------|-----|-----------|-----------|
| MB-3502    | 0.097       | 0.102               | UNS      | Neg    | Neg       | Neg       | Neg         | Neutral   | 2           | 50.79            | Post               | Y            | Pos | 0         | 229.33    |
| MB-3702    | 0.016       | 0.157               | MSL      | Neg    | Neg       | Neg       | Neg         | Neutral   | 2           | 37.16            | Pre                | Y            | Pos | 0         | 230.47    |
| MB-3706    | 0.019       | 0.000               | BL1      | Neg    | Neg       | Neg       | Neg         | Neutral   | 1           | 55.71            | Post               | N            | Neg | 1         | 38.8      |
| MB-4015    | 0.043       | 0.023               | UNS      | Neg    | Neg       | Neg       | Neg         | Loss      | NA          | 76.13            | Post               | N            | Neg | 1         | 11.3      |
| MB-4024    | 0.030       | 0.000               | M        | Neg    | Neg       | Neg       | Neg         | Loss      | 2           | 56.14            | Post               | N            | Neg | 0         | 124.1     |
| MB-4146    | 0.261       | 0.000               | IM       | Neg    | Neg       | Neg       | Neg         | Neutral   | 2           | 43.06            | Pre                | Y            | Pos | 1         | 15.63     |
| MB-4303    | 0.206       | 0.000               | NA       | Neg    | Neg       | Neg       | Neg         | Neutral   | 1           | 66.91            | Post               | N            | Neg | 1         | 89.03     |
| MB-4332    | 0.214       | 0.000               | BL1      | Neg    | Neg       | Neg       | Neg         | Neutral   | 1           | 34.36            | Pre                | N            | Neg | 0         | 307.93    |
| MB-4407    | 0.000       | 0.037               | M        | Neg    | Neg       | Neg       | Neg         | Neutral   | 1           | 44.4             | Pre                | N            | Neg | 1         | 83.37     |
| MB-4408    | 0.154       | 0.003               | UNS      | Neg    | Neg       | Neg       | Neg         | Neutral   | NA          | 71.66            | Post               | N            | Neg | 1         | 206.57    |
| MB-4416    | 0.230       | 0.017               | IM       | Neg    | Neg       | Neg       | Neg         | Neutral   | 2           | 44.89            | Pre                | Y            | Pos | 1         | 241.6     |
| MB-4417    | 0.000       | 0.101               | BL2      | Neg    | Neg       | Neg       | Neg         | Neutral   | 2           | 68.16            | Post               | N            | Neg | 1         | 16.7      |
| MB-4621    | 0.000       | 0.036               | UNS      | Neg    | Neg       | Neg       | Neg         | Neutral   | 3           | 39.51            | Pre                | Y            | Pos | 0         | 271.87    |
| MB-4622    | 0.000       | 0.251               | UNS      | Neg    | Neg       | Neg       | Neg         | Neutral   | 2           | 40.83            | Pre                | Y            | Pos | 1         | 282.83    |
| MB-4660    | 0.147       | 0.000               | UNS      | Neg    | Neg       | Neg       | Neg         | Neutral   | 2           | 37.53            | Pre                | Y            | Pos | 1         | 39.87     |
| MB-4679    | 0.160       | 0.005               | IM       | Neg    | Neg       | Neg       | Neg         | Neutral   | 1           | 64.11            | Post               | N            | Neg | 1         | 292.67    |
| MB-4696    | 0.000       | 0.126               | LAR      | Neg    | Neg       | Neg       | Neg         | Loss      | NA          | 49.98            | Pre                | N            | Neg | 0         | 255.27    |
| MB-4707    | 0.102       | 0.015               | UNS      | Neg    | Neg       | Neg       | Neg         | Neutral   | 2           | 59.85            | Post               | N            | Neg | 0         | 221.2     |
| MB-4715    | 0.095       | 0.041               | UNS      | Neg    | Neg       | Neg       | Neg         | Neutral   | 2           | 67.8             | Post               | Y            | Pos | 1         | 35.23     |
| MB-4717    | 0.056       | 0.000               | M        | Neg    | Neg       | Neg       | Neg         | Loss      | 2           | 43.51            | Pre                | N            | Neg | 1         | 42.9      |
| MB-4732    | 0.187       | 0.014               | IM       | Neg    | Neg       | Neg       | Neg         | Neutral   | 2           | 26.72            | Pre                | Y            | Pos | 0         | 149.87    |
| MB-4733    | 0.236       | 0.000               | IM       | Neg    | Neg       | Neg       | Neg         | Neutral   | 2           | 56.27            | Post               | Y            | Pos | 1         | 19.73     |
| MB-4757    | 0.029       | 0.035               | BL1      | Neg    | Neg       | Neg       | Neg         | Neutral   | NA          | 38.93            | Pre                | Y            | Pos | 1         | 27.4      |
| MB-4758    | 0.036       | 0.000               | M        | Neg    | Neg       | Neg       | Neg         | Neutral   | NA          | 45.77            | Pre                | N            | Neg | 0         | 211.93    |

METABRIC: Molecular Taxonomy of Breast Cancer International Consortium; TNBC: triple negative breast cancer; High quantity of T Cells: > 0.25\*standard deviation; Low quantity of T Cells: < 0.25\*standard deviation; ER: estrogen receptor; IHC: immunohistochemistry; Pos: Positive; Neg: negative; PR: progesterone receptor; HER2: human epidermal growth factor receptor 2; LN +: Lymph Node Positive; Y: Yes; N: No; OS: overall survival; DFS: disease free survival; BL1: basal-like 1; BL2: basal-like 2; IM: immunomodulatory; M: mesenchymal, MSL: mesenchymal stem-like, LAR: luminal androgen receptor; UNS: unstable; NA: not applicable



**Table S11:** 199 METABRIC TNBC Cases

| Patient ID | CD8 T Cells | T Cells gamma delta | Sub-type | ER IHC | ER Status | PR Status | HER2 Status | HER2 SNP6 | Tumor Stage | Age At Diagnosis | Inferred Menopause | Chemotherapy | LN+ | OS Status | OS Months |
|------------|-------------|---------------------|----------|--------|-----------|-----------|-------------|-----------|-------------|------------------|--------------------|--------------|-----|-----------|-----------|
| MB-4769    | 0.075       | 0.015               | BL1      | Neg    | Neg       | Neg       | Neg         | Neutral   | 2           | 65.86            | Post               | N            | Neg | 1         | 21.7      |
| MB-4792    | 0.026       | 0.019               | M        | Neg    | Neg       | Neg       | Neg         | Neutral   | 2           | 49.92            | Pre                | Y            | Pos | 1         | 40.63     |
| MB-4793    | 0.027       | 0.036               | IM       | Neg    | Neg       | Neg       | Neg         | Neutral   | 2           | 72.49            | Post               | N            | Neg | 1         | 83.37     |
| MB-4865    | 0.173       | 0.000               | UNS      | Neg    | Neg       | Neg       | Neg         | Neutral   | 2           | 50.7             | Post               | N            | Neg | 0         | 229.9     |
| MB-4881    | 0.280       | 0.000               | M        | Neg    | Neg       | Neg       | Neg         | Neutral   | NA          | 37.05            | Pre                | N            | Neg | 0         | 274.2     |
| MB-4888    | 0.078       | 0.012               | MSL      | Neg    | Neg       | Neg       | Neg         | Neutral   | 1           | 63.95            | Post               | N            | Neg | 0         | 230.5     |
| MB-4893    | 0.280       | 0.084               | IM       | Neg    | Neg       | Neg       | Neg         | Neutral   | 2           | 33.04            | Pre                | Y            | Pos | 0         | 176.7     |
| MB-4911    | 0.072       | 0.000               | BL1      | Neg    | Neg       | Neg       | Neg         | Neutral   | 2           | 43.51            | Pre                | Y            | Pos | 1         | 31.43     |
| MB-4931    | 0.338       | 0.215               | IM       | Neg    | Neg       | Neg       | Neg         | Neutral   | 2           | 58.39            | Post               | N            | Neg | 1         | 30.37     |
| MB-4938    | 0.016       | 0.000               | M        | Neg    | Neg       | Neg       | Neg         | Neutral   | 2           | 33.92            | Pre                | Y            | Pos | 1         | 70.6      |
| MB-4945    | 0.093       | 0.030               | M        | Neg    | Neg       | Neg       | Neg         | Neutral   | NA          | 65.53            | Post               | Y            | Pos | 1         | 20.13     |
| MB-4974    | 0.116       | 0.125               | BL1      | Neg    | Neg       | Neg       | Neg         | Neutral   | 1           | 65.16            | Post               | N            | Neg | 1         | 176.1     |
| MB-4993    | 0.000       | 0.036               | LAR      | Neg    | Neg       | Neg       | Neg         | Neutral   | 2           | 33.55            | Pre                | Y            | Pos | 1         | 75.23     |
| MB-5008    | 0.035       | 0.026               | NA       | Neg    | Neg       | Neg       | Neg         | Neutral   | 3           | 65.76            | Post               | Y            | Pos | 0         | 223.3     |
| MB-5057    | 0.126       | 0.035               | UNS      | Neg    | Neg       | Neg       | Neg         | Neutral   | 1           | 39.25            | Pre                | N            | Neg | 1         | 56.33     |
| MB-5070    | 0.015       | 0.062               | IM       | Neg    | Neg       | Neg       | Neg         | Loss      | NA          | 47.38            | Pre                | Y            | Pos | 0         | 213.9     |
| MB-5072    | 0.041       | 0.058               | LAR      | Neg    | Neg       | Neg       | Neg         | Neutral   | 2           | 52.23            | Post               | Y            | Pos | 1         | 50.23     |
| MB-5076    |             |                     |          | Neg    | Neg       | Neg       | Neg         | Neutral   | 2           | 28.05            | Pre                | Y            | Pos | 1         | 26.87     |
| MB-5100    | 0.137       | 0.000               | IM       | Neg    | Neg       | Neg       | Neg         | Neutral   | 2           | 32.74            | Pre                | Y            | Pos | 1         | 19.9      |
| MB-5102    | 0.007       | 0.068               | M        | Neg    | Neg       | Neg       | Neg         | Neutral   | 2           | 69.93            | Post               | Y            | Pos | 1         | 30.37     |
| MB-5115    | 0.000       | 0.043               | BL1      | Neg    | Neg       | Neg       | Neg         | Neutral   | 2           | 40.57            | Pre                | Y            | Pos | 0         | 77.4      |
| MB-5126    | 0.073       | 0.076               | BL1      | Neg    | Neg       | Neg       | Neg         | Neutral   | NA          | 63.48            | Post               | Y            | Pos | 1         | 27.3      |
| MB-5135    | 0.006       | 0.009               | M        | Neg    | Neg       | Neg       | Neg         | Neutral   | 2           | 38.59            | Pre                | N            | Neg | 1         | 37.37     |
| MB-5138    | 0.085       | 0.021               | IM       | Neg    | Neg       | Neg       | Neg         | Neutral   | NA          | 44.59            | Pre                | Y            | Pos | 1         | 37        |
| MB-5155    | 0.050       | 0.067               | NA       | Neg    | Neg       | Neg       | Neg         | Neutral   | 2           | 51.08            | Post               | Y            | Pos | 0         | 259.93    |

METABRIC: Molecular Taxonomy of Breast Cancer International Consortium; TNBC: triple negative breast cancer; High quantity of T Cells: > 0.25\*standard deviation; Low quantity of T Cells: < 0.25\*standard deviation; ER: estrogen receptor; IHC: immunohistochemistry; Pos: Positive; Neg: negative; PR: progesterone receptor; HER2: human epidermal growth factor receptor 2; LN +: Lymph Node Positive; Y: Yes; N: No; OS: overall survival; DFS: disease free survival; BL1: basal-like 1; BL2: basal-like 2; IM: immunomodulatory; M: mesenchymal, MSL: mesenchymal stem-like, LAR: luminal androgen receptor; UNS: unstable; NA: not applicable

**Table S11:** 199 METABRIC TNBC Cases

| Patient ID | CD8 T Cells | T Cells gamma delta | Sub-type | ER IHC | ER Status | PR Status | HER2 Status | HER2 SNP6 | Tumor Stage | Age At Diagnosis | Inferred Menopause | Chemotherapy | LN+ | OS Status | OS Months |
|------------|-------------|---------------------|----------|--------|-----------|-----------|-------------|-----------|-------------|------------------|--------------------|--------------|-----|-----------|-----------|
| MB-5173    | 0.019       | 0.039               | M        | Neg    | Neg       | Neg       | Neg         | Neutral   | 2           | 69.05            | Post               | N            | Neg | 1         | 22.13     |
| MB-5208    | 0.039       | 0.088               | M        | Neg    | Neg       | Neg       | Neg         | Neutral   | 2           | 52.43            | Post               | N            | Neg | 0         | 151.9     |
| MB-5209    | 0.248       | 0.038               | IM       | Neg    | Neg       | Neg       | Neg         | Neutral   | 2           | 79.17            | Post               | N            | Neg | 1         | 175.1     |
| MB-5223    | 0.231       | 0.067               | MSL      | Neg    | Neg       | Neg       | Neg         | Neutral   | 2           | 42.05            | Pre                | Y            | Pos | 1         | 144.67    |
| MB-5225    | 0.339       | 0.220               | UNS      | Neg    | Neg       | Neg       | Neg         | Neutral   | 2           | 68.01            | Post               | N            | Neg | 1         | 43.27     |
| MB-5232    | 0.145       | 0.084               | MSL      | Neg    | Neg       | Neg       | Neg         | Neutral   | 1           | 74.53            | Post               | N            | Neg | 1         | 211.2     |
| MB-5236    | 0.123       | 0.000               | BL1      | Neg    | Neg       | Neg       | Neg         | Neutral   | 3           | 63.02            | Post               | Y            | Pos | 0         | 166.67    |
| MB-5258    | 0.029       | 0.000               | BL1      | Neg    | Neg       | Neg       | Neg         | Neutral   | 2           | 72.77            | Post               | N            | Neg | 1         | 101.07    |
| MB-5281    | 0.000       | 0.000               | LAR      | Neg    | Neg       | Neg       | Neg         | Neutral   | 1           | 55.72            | Post               | N            | Neg | 0         | 79.3      |
| MB-5295    | 0.129       | 0.000               | M        | Neg    | Neg       | Neg       | Neg         | Neutral   | 2           | 60.51            | Post               | N            | Neg | 1         | 75.7      |
| MB-5323    | 0.346       | 0.000               | IM       | Neg    | Neg       | Neg       | Neg         | Loss      | 1           | 31.26            | Pre                | N            | Neg | 0         | 226.07    |
| MB-5335    | 0.058       | 0.015               | M        | Neg    | Neg       | Neg       | Neg         | Neutral   | 2           | 41.81            | Pre                | N            | Neg | 1         | 25.23     |
| MB-5346    | 0.077       | 0.031               | BL1      | Neg    | Neg       | Neg       | Neg         | Neutral   | NA          | 52.09            | Post               | Y            | Pos | 0         | 194.3     |
| MB-5348    | 0.066       | 0.102               | IM       | Neg    | Neg       | Neg       | Neg         | Neutral   | 2           | 41.27            | Pre                | Y            | Pos | 0         | 169.67    |
| MB-5421    | 0.000       | 0.040               | M        | Neg    | Neg       | Neg       | Neg         | Neutral   | 1           | 68               | Post               | N            | Neg | 0         | 194.57    |
| MB-5427    | 0.162       | 0.000               | M        | Neg    | Neg       | Neg       | Neg         | Neutral   | 2           | 83.68            | Post               | N            | Neg | 1         | 155.73    |
| MB-5440    | 0.113       | 0.077               | IM       | Neg    | Neg       | Neg       | Neg         | Neutral   | 2           | 49.05            | Pre                | Y            | Pos | 0         | 196.63    |
| MB-5446    | 0.000       | 0.000               | LAR      | Neg    | Neg       | Neg       | Neg         | Neutral   | 2           | 51.25            | Post               | Y            | Pos | 1         | 162.83    |
| MB-5450    | 0.083       | 0.057               | IM       | Neg    | Neg       | Neg       | Neg         | Neutral   | 1           | 38.92            | Pre                | N            | Neg | 0         | 190.2     |
| MB-5465    | 0.023       | 0.047               | M        | Neg    | Neg       | Neg       | Neg         | Loss      | 2           | 69.83            | Post               | N            | Neg | 1         | 18.8      |
| MB-5526    | 0.040       | 0.102               | UNS      | Neg    | Neg       | Neg       | Neg         | Neutral   | 1           | 45.42            | Pre                | N            | Neg | 0         | 151.07    |
| MB-5529    | 0.135       | 0.005               | BL1      | Neg    | Neg       | Neg       | Neg         | Neutral   | 2           | 40.21            | Pre                | Y            | Pos | 1         | 14.8      |
| MB-5531    | 0.065       | 0.014               | BL2      | Neg    | Neg       | Neg       | Neg         | Neutral   | 1           | 66.56            | Post               | N            | Neg | 0         | 183.97    |
| MB-5547    | 0.018       | 0.060               | M        | Neg    | Neg       | Neg       | Neg         | Neutral   | 2           | 43.08            | Pre                | Y            | Pos | 0         | 98.57     |

METABRIC: Molecular Taxonomy of Breast Cancer International Consortium; TNBC: triple negative breast cancer; **High quantity of T Cells: > 0.25\*standard deviation**; **Low quantity of T Cells: < 0.25\*standard deviation**; ER: estrogen receptor; IHC: immunohistochemistry; Pos: Positive; Neg: negative; PR: progesterone receptor; HER2: human epidermal growth factor receptor 2; LN +: Lymph Node Positive; Y: Yes; N: No; OS: overall survival; DFS: disease free survival; BL1: basal-like 1; BL2: basal-like 2; IM: immunomodulatory; M: mesenchymal, MSL: mesenchymal stem-like, LAR: luminal androgen receptor; UNS: unstable; NA: not applicable

**Table S11:** 199 METABRIC TNBC Cases

| Patient ID | CD8 T Cells | T Cells gamma delta | Sub-type | ER IHC | ER Status | PR Status | HER2 Status | HER2 SNP6 | Tumor Stage | Age At Diagnosis | Inferred Menopause | Chemotherapy | LN+ | OS Status | OS Months |
|------------|-------------|---------------------|----------|--------|-----------|-----------|-------------|-----------|-------------|------------------|--------------------|--------------|-----|-----------|-----------|
| MB-5548    | 0.021       | 0.058               | IM       | Neg    | Neg       | Neg       | Neg         | Neutral   | NA          | 62.43            | Post               | N            | Neg | 0         | 25.33     |
| MB-5551    | 0.000       | 0.000               | M        | Neg    | Neg       | Neg       | Neg         | Neutral   | 2           | 67.24            | Post               | N            | Neg | 0         | 182.23    |
| MB-5560    | 0.061       | 0.000               | MSL      | Neg    | Neg       | Neg       | Neg         | Loss      | 1           | 44.05            | Pre                | N            | Neg | 0         | 186.6     |
| MB-5566    | 0.044       | 0.000               | MSL      | Neg    | Neg       | Neg       | Neg         | Neutral   | NA          | 38.44            | Pre                | Y            | Pos | 0         | 234.4     |
| MB-5572    | 0.142       | 0.114               | IM       | Neg    | Neg       | Neg       | Neg         | Neutral   | 1           | 47.88            | Pre                | N            | Neg | 0         | 178.63    |
| MB-5602    | 0.098       | 0.126               | IM       | Neg    | Neg       | Neg       | Neg         | Neutral   | NA          | 39.7             | Pre                | Y            | Pos | 0         | 224.43    |
| MB-5616    | 0.136       | 0.000               | IM       | Neg    | Neg       | Neg       | Neg         | Neutral   | 2           | 41.53            | Pre                | Y            | Pos | 0         | 180.63    |
| MB-5624    | 0.000       | 0.058               | UNS      | Neg    | Neg       | Neg       | Neg         | Neutral   | NA          | 55.43            | Post               | Y            | Pos | 0         | 136       |
| MB-5625    |             |                     |          | Neg    | Neg       | Neg       | Neg         | Neutral   | NA          | 45.51            | Pre                | Y            |     | 1         | 32.3      |
| MB-5633    | 0.109       | 0.000               | IM       | Neg    | Neg       | Neg       | Neg         | Neutral   | 3           | 62.7             | Post               | Y            | Pos | 1         | 35.03     |
| MB-5634    | 0.041       | 0.011               | IM       | Neg    | Neg       | Neg       | Neg         | Neutral   | 2           | 55.53            | Post               | N            | Neg | 1         | 62.9      |
| MB-5655    | 0.000       | 0.038               | UNS      | Neg    | Neg       | Neg       | Neg         | Neutral   | 2           | 67.57            | Post               | N            | Neg | 0         | 191.8     |
| MB-6052    | 0.111       | 0.177               | NA       | Neg    | Neg       | Neg       | Neg         | Neutral   | NA          | 36.47            | Pre                | N            | Neg | 0         | 255.37    |
| MB-6058    | 0.210       | 0.055               | IM       | Neg    | Neg       | Neg       | Neg         | Neutral   | NA          | 41.79            | Pre                | Y            | Pos | 1         | 22.67     |
| MB-6098    | 0.096       | 0.000               | UNS      | Neg    | Neg       | Neg       | Neg         | Neutral   | NA          | 28.29            | Pre                | Y            | Pos | 1         | 10.63     |
| MB-6143    | 0.000       | 0.025               | M        | Neg    | Neg       | Neg       | Neg         | Neutral   | 2           | 60.6             | Post               | N            | Neg | 0         | 255.6     |
| MB-6178    | 0.103       | 0.007               | UNS      | Neg    | Neg       | Neg       | Neg         | Neutral   | NA          | 38.58            | Pre                | N            | Pos | 1         | 33.13     |
| MB-6242    | 0.189       | 0.000               | BL2      | Neg    | Neg       | Neg       | Neg         | Neutral   | NA          | 41.29            | Pre                | Y            | Pos | 0         | 165.43    |
| MB-6245    | 0.000       | 0.078               | M        | Neg    | Neg       | Neg       | Neg         | Neutral   | NA          | 47.01            | Pre                | N            | Neg | 0         | 177.63    |
| MB-6248    | 0.000       | 0.095               | BL1      | Neg    | Neg       | Neg       | Neg         | Neutral   | NA          | 51.22            | Post               | Y            | Pos | 0         | 182.83    |
| MB-6251    | 0.048       | 0.014               | M        | Neg    | Neg       | Neg       | Neg         | Loss      | 2           | 48.59            | Pre                | Y            | Pos | 1         | 14.7      |
| MB-6272    | 0.022       | 0.008               | UNS      | Neg    | Neg       | Neg       | Neg         | Neutral   | NA          | 36.93            | Pre                | Y            | Pos | 1         | 22.4      |
| MB-6280    | 0.009       | 0.026               | BL1      | Neg    | Neg       | Neg       | Neg         | Neutral   | NA          | 53.68            | Post               | Y            | Pos | 1         | 27.87     |
| MB-6336    | 0.182       | 0.000               | UNS      | Neg    | Neg       | Neg       | Neg         | Neutral   | NA          | 63.22            | Post               | Y            | Pos | 1         | 17.2      |

METABRIC: Molecular Taxonomy of Breast Cancer International Consortium; TNBC: triple negative breast cancer; **High quantity of T Cells: > 0.25\*standard deviation**; **Low quantity of T Cells: < 0.25\*standard deviation**; ER: estrogen receptor; IHC: immunohistochemistry; Pos: Positive; Neg: negative; PR: progesterone receptor; HER2: human epidermal growth factor receptor 2; LN +: Lymph Node Positive; Y: Yes; N: No; OS: overall survival; DFS: disease free survival; BL1: basal-like 1; BL2: basal-like 2; IM: immunomodulatory; M: mesenchymal, MSL: mesenchymal stem-like, LAR: luminal androgen receptor; UNS: unstable; NA: not applicable

**Table S11:** 199 METABRIC TNBC Cases

| Patient ID | CD8 T Cells | T Cells gamma delta | Sub-type | ER IHC | ER Status | PR Status | HER2 Status | HER2 SNP6 | Tumor Stage | Age At Diagnosis | Inferred Menopause | Chemotherapy | LN+ | OS Status | OS Months |
|------------|-------------|---------------------|----------|--------|-----------|-----------|-------------|-----------|-------------|------------------|--------------------|--------------|-----|-----------|-----------|
| MB-7008    | 0.113       | 0.036               | LAR      | Neg    | Neg       | Neg       | Neg         | Neutral   | NA          | 69.94            | Post               | N            | Neg | 1         | 50.9      |
| MB-7009    | 0.023       | 0.021               | M        | Neg    | Neg       | Neg       | Neg         | Neutral   | NA          | 68.28            | Post               | Y            | Pos | 1         | 54.77     |
| MB-7012    | 0.029       | 0.027               | BL1      | Neg    | Neg       | Neg       | Neg         | Neutral   | NA          | 60.96            | Post               | Y            | Neg | 1         | 19.83     |
| MB-7023    | 0.128       | 0.067               | BL2      | Neg    | Neg       | Neg       | Neg         | Neutral   | NA          | 66.66            | Post               | Y            | Pos | 1         | 27.97     |
| MB-7025    | 0.076       | 0.029               | MSL      | Neg    | Neg       | Neg       | Neg         | Neutral   | NA          | 65.22            | Post               | N            | Neg | 0         | 80.23     |
| MB-7031    | 0.125       | 0.000               | NA       | Neg    | Neg       | Neg       | Neg         | Neutral   | NA          | 60.58            | Post               | Y            | Pos | 0         | 85.37     |
| MB-7036    | 0.127       | 0.070               | BL1      | Neg    | Neg       | Neg       | Neg         | Neutral   | NA          | 54.48            | Post               | Y            | Pos | 0         | 120.43    |
| MB-7038    | 0.037       | 0.090               | M        | Neg    | Neg       | Neg       | Neg         | Neutral   | NA          | 57.62            | Post               | Y            | Pos | 0         | 81.03     |
| MB-7045    | 0.169       | 0.000               | LAR      | Neg    | Neg       | Neg       | Neg         | Neutral   | NA          | 61.39            | Post               | N            | Neg | 1         | 94.93     |
| MB-7049    | 0.285       | 0.000               | M        | Neg    | Neg       | Neg       | Neg         | Neutral   | NA          | 48.75            | Pre                | N            | Neg | 0         | 102.03    |
| MB-7052    | 0.109       | 0.127               | IM       | Neg    | Neg       | Neg       | Neg         | Neutral   | NA          | 45.45            | Pre                | N            | Neg | 0         | 106.13    |
| MB-7055    | 0.005       | 0.008               | M        | Neg    | Neg       | Neg       | Neg         | Neutral   | NA          | 54.87            | Post               | N            | Neg | 1         | 9.13      |
| MB-7057    | 0.046       | 0.069               | NA       | Neg    | Neg       | Neg       | Neg         | Neutral   | NA          | 72.81            | Post               | Y            | Pos | 1         | 43.83     |
| MB-7078    | 0.108       | 0.000               | BL2      | Neg    | Neg       | Neg       | Neg         | Neutral   | NA          | 74.8             | Post               | N            | Neg | 1         | 4.17      |
| MB-7081    | 0.111       | 0.126               | IM       | Neg    | Neg       | Neg       | Neg         | Neutral   | NA          | 69.12            | Post               | N            | Neg | 0         | 140.23    |
| MB-7087    | 0.044       | 0.000               | NA       | Neg    | Neg       | Neg       | Neg         | Neutral   | NA          | 66.61            | Post               | Y            | Pos | 1         | 5.07      |
| MB-7090    | 0.049       | 0.015               | BL2      | Neg    | Neg       | Neg       | Neg         | Neutral   | NA          | 48.52            | Pre                | Y            | Pos | 0         | 109.77    |
| MB-7114    | 0.041       | 0.056               | BL1      | Neg    | Neg       | Neg       | Neg         | Neutral   | NA          | 55.57            | Post               | N            | Neg | 0         | 123.27    |
| MB-7119    | 0.031       | 0.144               | IM       | Neg    | Neg       | Neg       | Neg         | Neutral   | NA          | 54.53            | Post               | Y            | Pos | 0         | 128.37    |
| MB-7121    | 0.097       | 0.108               | IM       | Neg    | Neg       | Neg       | Neg         | Neutral   | NA          | 49.02            | Pre                | Y            | Pos | 1         | 88.83     |
| MB-7145    | 0.035       | 0.054               | BL1      | Neg    | Neg       | Neg       | Neg         | Neutral   | NA          | 44.42            | Pre                | Y            | Pos | 0         | 138.33    |
| MB-7154    | 0.308       | 0.027               | IM       | Neg    | Neg       | Neg       | Neg         | Neutral   | NA          | 77.54            | Post               | N            | Neg | 1         | 108.47    |
| MB-7155    | 0.061       | 0.074               | UNS      | Neg    | Neg       | Neg       | Neg         | Neutral   | NA          | 41.14            | Pre                | Y            | Pos | 0         | 149.77    |
| MB-7158    | 0.065       | 0.032               | IM       | Neg    | Neg       | Neg       | Neg         | Neutral   | NA          | 50.73            | Post               | Y            | Pos | 1         | 46.43     |

METABRIC: Molecular Taxonomy of Breast Cancer International Consortium; TNBC: triple negative breast cancer; **High quantity of T Cells: > 0.25\*standard deviation**; **Low quantity of T Cells: < 0.25\*standard deviation**; ER: estrogen receptor; IHC: immunohistochemistry; Pos: Positive; Neg: negative; PR: progesterone receptor; HER2: human epidermal growth factor receptor 2; LN +: Lymph Node Positive; Y: Yes; N: No; OS: overall survival; DFS: disease free survival; BL1: basal-like 1; BL2: basal-like 2; IM: immunomodulatory; M: mesenchymal, MSL: mesenchymal stem-like, LAR: luminal androgen receptor; UNS: unstable; NA: not applicable

**Table S11:** 199 METABRIC TNBC Cases

| Patient ID | CD8 T Cells | T Cells gamma delta | Sub-type | ER IHC | ER Status | PR Status | HER2 Status | HER2 SNP6 | Tumor Stage | Age At Diagnosis | Inferred Menopause | Chemotherapy | LN+ | OS Status | OS Months |
|------------|-------------|---------------------|----------|--------|-----------|-----------|-------------|-----------|-------------|------------------|--------------------|--------------|-----|-----------|-----------|
| MB-7159    | 0.000       | 0.000               | M        | Neg    | Neg       | Neg       | Neg         | Neutral   | NA          | 60.45            | Post               | Y            | Neg | 1         | 21.93     |
| MB-7165    | 0.021       | 0.020               | BL1      | Neg    | Neg       | Neg       | Neg         | Neutral   | NA          | 28.78            | Pre                | Y            | Pos | 0         | 147.17    |
| MB-7205    | 0.070       | 0.042               | IM       | Neg    | Neg       | Neg       | Neg         | Neutral   | NA          | 38.17            | Pre                | Y            | Pos | 0         | 166.03    |
| MB-7208    | 0.160       | 0.071               | LAR      | Neg    | Neg       | Neg       | Neg         | Neutral   | NA          | 48.83            | Pre                | Y            | Pos | 1         | 45.93     |
| MB-7258    | 0.209       | 0.000               | LAR      | Neg    | Neg       | Neg       | Neg         | Neutral   | NA          | 45.11            | Pre                | Y            | Pos | 1         | 15.07     |
| MB-7270    | 0.000       | 0.187               | LAR      | Neg    | Neg       | Neg       | Neg         | Neutral   | NA          | 50.84            | Post               | Y            | Pos | 0         | 175.17    |

METABRIC: Molecular Taxonomy of Breast Cancer International Consortium; TNBC: triple negative breast cancer; **High quantity of T Cells: > 0.25\*standard deviation**; **Low quantity of T Cells: < 0.25\*standard deviation**; ER: estrogen receptor; IHC: immunohistochemistry; Pos: Positive; Neg: negative; PR: progesterone receptor; HER2: human epidermal growth factor receptor 2; LN +: Lymph Node Positive; Y: Yes; N: No; OS: overall survival; DFS: disease free survival; BL1: basal-like 1; BL2: basal-like 2; IM: immunomodulatory; M: mesenchymal, MSL: mesenchymal stem-like, LAR: luminal androgen receptor; UNS: unstable; NA: not applicable
